# Supplementary material
Source: PubMed Central journal article supplement (PMC6296492)
Supplement: NIHMS993203-supplement-Supplemental.pdf [file NIHMS993203-supplement-Supplemental.pdf]

## Catalytic Silylation of Dinitrogen by a Family of Triiron Complexes

Ricardo Ferreira<sup>†</sup>, Brian J. Cook<sup>†</sup>, Brian J. Knight<sup>†</sup>, Vincent J. Catalano<sup>‡</sup>, Ricardo García-Serres,<sup>§</sup> and Leslie J. Murray<sup>†,\*</sup>

<sup>†</sup> Center for Catalysis and Florida Center for Heterocyclic Chemistry, Department of Chemistry, University of Florida, Gainesville, FL 32611, USA

<sup>‡</sup> Department of Chemistry, University of Nevada, Reno, NV 89557, United States

<sup>§</sup> Université Grenoble Alpes, CNRS, CEA, BIG, LCBM (UMR 5249), F-38054 Grenoble, France

\*Correspondence: murray@chem.ufl.edu

### Table of Contents

|                                                                                                                                                                                                                                                        |    |
|--------------------------------------------------------------------------------------------------------------------------------------------------------------------------------------------------------------------------------------------------------|----|
| <b>Experimental Section</b> .....                                                                                                                                                                                                                      | 3  |
| <b>Characterization of New Compounds</b> .....                                                                                                                                                                                                         | 5  |
| Figure S1. ESI-MS spectrum of Fe <sub>3</sub> (μ <sub>3</sub> -N)L in THF (positive mode).....                                                                                                                                                         | 5  |
| Figure S2. <sup>1</sup> H NMR spectrum of Fe <sub>3</sub> (μ <sub>3</sub> -N)L in C <sub>6</sub> D <sub>6</sub> .....                                                                                                                                  | 6  |
| Figure S3. ATR-IR spectrum of Fe <sub>3</sub> (μ <sub>3</sub> -N)L, synthesized from KHB(sec-Bu) <sub>3</sub> in toluene, recorded as a thin film. ....                                                                                                | 7  |
| Figure S4. ATR-IR of Fe <sub>3</sub> (μ <sub>3</sub> -N)L synthesis from KHBET <sub>3</sub> in toluene, recorded as a thin film. ....                                                                                                                  | 7  |
| Figure S5. Cyclic Voltammetry (CV) of Fe <sub>3</sub> (μ <sub>3</sub> -N)L. ....                                                                                                                                                                       | 8  |
| Figure S6. <sup>1</sup> H NMR spectrum of Fe <sub>3</sub> O <sub>3</sub> L in C <sub>6</sub> D <sub>6</sub> . ....                                                                                                                                     | 9  |
| Figure S7. IR spectrum of Fe <sub>3</sub> O <sub>3</sub> L.....                                                                                                                                                                                        | 10 |
| Figure S8. UV-Vis spectrum of Fe <sub>3</sub> O <sub>3</sub> L in THF. ....                                                                                                                                                                            | 10 |
| Figure S9. <sup>1</sup> H NMR spectrum of Fe <sub>3</sub> Cl <sub>3</sub> L in C <sub>6</sub> D <sub>6</sub> . ....                                                                                                                                    | 11 |
| Figure S10. IR spectrum of Fe <sub>3</sub> Cl <sub>3</sub> L.....                                                                                                                                                                                      | 12 |
| Figure S11. UV-Vis spectrum of Fe <sub>3</sub> Cl <sub>3</sub> L in THF.....                                                                                                                                                                           | 12 |
| Figure S12. Mössbauer spectrum of Fe <sub>3</sub> O <sub>3</sub> L recorded at 80 K and zero-applied field.....                                                                                                                                        | 13 |
| Figure S13. Single-crystal structure of Fe <sub>3</sub> Cl <sub>3</sub> L at 50% thermal ellipsoid. ....                                                                                                                                               | 14 |
| Table S1. 80 K Mössbauer parameters of complexes used as silylation catalysts. ....                                                                                                                                                                    | 15 |
| <b>Catalytic silylation data</b> .....                                                                                                                                                                                                                 | 16 |
| Figure S14. <sup>1</sup> H NMR of the reaction between 500 equiv. KC <sub>8</sub> and 500 equiv. Me <sub>3</sub> SiCl with 0.2 mol % Fe <sub>3</sub> (μ <sub>3</sub> -N)L in Et <sub>2</sub> O in DMSO- <i>d</i> <sub>6</sub> after HCl quenching..... | 16 |
| Figure S15. Gas chromatogram of the reaction mixture using 500 equiv. KC <sub>8</sub> and 500 equiv. Me <sub>3</sub> SiCl with 0.2 mol % Fe <sub>3</sub> Br <sub>3</sub> L in Et <sub>2</sub> O after 24 h. ....                                       | 17 |
| Figure S16. Influence of reaction time on N(SiMe <sub>3</sub> ) <sub>3</sub> production. ....                                                                                                                                                          | 18 |
| Figure S17. Influence of the concentration of the system on the yield of NH <sub>4</sub> <sup>+</sup> obtained using Fe <sub>3</sub> Br <sub>3</sub> L. ....                                                                                           | 19 |

|                                                                                                                                                                                                                                            |    |
|--------------------------------------------------------------------------------------------------------------------------------------------------------------------------------------------------------------------------------------------|----|
| Figure S18. Influence of reaction time on $N(\text{SiMe}_3)_3$ production at $-34\text{ }^\circ\text{C}$ in $\text{Et}_2\text{O}:\text{PhMe} = 9:1$ .....                                                                                  | 19 |
| Table S2. Catalytic performance of reported iron-based complexes for the silylation of $\text{N}_2$ .....                                                                                                                                  | 20 |
| Table S3. Catalytic performance of selected complexes for the silylation of $\text{N}_2$ containing other metals .....                                                                                                                     | 21 |
| <b>Reactivity of triiron compounds under reducing conditions</b> .....                                                                                                                                                                     | 22 |
| Figure S19. $^1\text{H}$ NMR spectra in $\text{C}_6\text{D}_6$ of $\text{Fe}_3\text{Br}_3\text{L}$ with 3 equiv. of $\text{KC}_8$ in toluene (bottom), THF (middle), and $\text{Et}_2\text{O}$ (top) .....                                 | 22 |
| Figure S20. $^1\text{H}$ NMR spectra in $\text{C}_6\text{D}_6$ of $\text{Fe}_3\text{Br}_3\text{L}$ with 6 equiv. of $\text{KC}_8$ in toluene (bottom), THF (middle), and $\text{Et}_2\text{O}$ (top) .....                                 | 23 |
| Figure S21. $^1\text{H}$ NMR spectra in $\text{C}_6\text{D}_6$ of $\text{Fe}_3\text{Br}_3\text{L}$ with 6 equiv. of $\text{KC}_8$ and $\text{Me}_3\text{SiCl}$ in toluene at $25\text{ }^\circ\text{C}$ after 24 h. ....                   | 24 |
| Figure S22. $^1\text{H}$ NMR spectra in $\text{C}_6\text{D}_6$ of $\text{Fe}_3\text{F}_3\text{L}$ with 6 equiv. of $\text{KC}_8$ and 6 equiv $\text{Me}_3\text{SiCl}$ in toluene at $25\text{ }^\circ\text{C}$ after 24 h. ....            | 25 |
| Figure S23. $^1\text{H}$ NMR spectra in $\text{C}_6\text{D}_6$ of $\text{Fe}_3\text{Cl}_3\text{L}$ with 6 equiv. of $\text{KC}_8$ and 6 equiv. of $\text{Me}_3\text{SiCl}$ in toluene at $25\text{ }^\circ\text{C}$ after 24 h. ....       | 26 |
| Figure S24. $^1\text{H}$ NMR spectra in $\text{C}_6\text{D}_6$ of $\text{Fe}_3\text{S}_3\text{L}$ with 6 equiv. of $\text{KC}_8$ and 6 equiv. of $\text{Me}_3\text{SiCl}$ in toluene at $25\text{ }^\circ\text{C}$ after 24 h. ....        | 27 |
| Figure S25. $^1\text{H}$ NMR of the reaction between $\text{Fe}_3(\mu_3\text{-N})\text{L}$ , 1 equiv. $\text{KC}_8$ and 1 equiv. $\text{Me}_3\text{SiCl}$ in THF at $-35\text{ }^\circ\text{C}$ recorded in $\text{C}_6\text{D}_6$ .....   | 28 |
| Figure S26. $^1\text{H}$ NMR of the reaction between $\text{Fe}_3(\mu_3\text{-N})\text{L}$ , 3 equiv. $\text{KC}_8$ and 3 equiv. $\text{Me}_3\text{SiCl}$ in THF at $-35\text{ }^\circ\text{C}$ recorded in $\text{C}_6\text{D}_6$ .....   | 29 |
| Figure S27. $^1\text{H}$ NMR of the reaction between $\text{Fe}_3(\mu_3\text{-N})\text{L}$ , 20 equiv. $\text{KC}_8$ and 20 equiv. $\text{Me}_3\text{SiCl}$ in THF at $-35\text{ }^\circ\text{C}$ recorded in $\text{C}_6\text{D}_6$ ..... | 30 |
| <b>Crystallographic data</b> .....                                                                                                                                                                                                         | 31 |
| Table S4. Crystal data for $\text{Fe}_3\text{Cl}_3\text{L}$ .....                                                                                                                                                                          | 31 |
| <b>References</b> .....                                                                                                                                                                                                                    | 32 |

## Experimental Section

**General Considerations.** All manipulations were carried out inside a N<sub>2</sub>-filled Innovative Technologies glovebox unless otherwise stated. Tetrahydrofuran (THF), benzene, toluene, *n*-hexane, and diethyl ether were purchased from Sigma-Aldrich, then purified through drying columns from Innovative Technologies solvent purification system, and stored over activated 3 Å molecular sieves. Dimethylsulfoxide-*d*<sub>6</sub> (DMSO-*d*<sub>6</sub>) was purchased from Cambridge Isotope Laboratories and used without further purification. C<sub>6</sub>D<sub>6</sub> was purchased from Cambridge Isotope Laboratories, dried over CaH<sub>2</sub> under reflux, then distilled and degassed and stored over 3 Å molecular sieves. Fe<sub>3</sub>Br<sub>3</sub>L, Fe<sub>3</sub>X<sub>3</sub>L (X = H, F, S), Fe<sub>3</sub>H<sub>2</sub>(HCOO)L, (FeCO)<sub>2</sub>Fe(μ<sub>3</sub>-H)L, Fe<sub>3</sub>Br<sub>2</sub>(μ<sub>3</sub>-N)L, and [FeCIL']<sub>2</sub> were synthesized as reported previously.<sup>1-6</sup>

<sup>1</sup>H Nuclear Magnetic Resonance (<sup>1</sup>H NMR) spectra were recorded on a Varian Inova 500 MHz spectrometer or a Mercury operating at 300 MHz equipped with a three-channel 5 mm indirect detection probe with z-axis gradients. Chemical shifts were reported in δ (ppm) and were referenced to solvent resonances δ<sub>H</sub> = 7.16 ppm and 2.50 ppm for benzene-*d*<sub>6</sub> and dimethylsulfoxide-*d*<sub>6</sub>, respectively. FT-IR spectra were collected on drop-casted samples using a ThermoFisher Scientific Nicolet iS5 spectrometer equipped with an iD7 ATR stage and using the OMNIC software package at 1.0 cm<sup>-1</sup> resolution and 32 scans per sample. Mass spectrometry data were collected using an Agilent 6220 ESI-TOF on samples prepared in THF or MeCN at analyte concentrations of 16.0 μM. Gas chromatography was performed using a Shimadzu GC-2014 instrument equipped with a Quadrex fused silica capillary column (Methyl 5% Phenyl Silicone, length: 30 m, inner diameter: 0.25 mm, film thickness: 0.25 μm). The instrument.

**Reductions of Fe<sub>3</sub>Br<sub>3</sub>L with 3 or 6 equivalents of KC<sub>8</sub>.** Fe<sub>3</sub>Br<sub>3</sub>L (20.0 mg, 18.2 μmol) was combined with 3 or 6 equivalents of KC<sub>8</sub> as solids and cooled down to -34 °C. To the solids, 8 mL of the desired solvent (toluene, THF, or Et<sub>2</sub>O) was added at -34 °C under stirring using a glass stirbar. The mixture was kept at -34 °C under stirring for 16 h, then filtered over a Nylon membrane in which the black residue was washed with 2 mL of the corresponding solvent. The combined amber filtrate was evaporated under reduced pressure to afford brown solids that were assessed by <sup>1</sup>H-NMR.

**Stoichiometric reductions of triiron complexes with 6 equivalents of KC<sub>8</sub>.** In a typical experiment, triiron complex (22.0 μmol) was combined with 6 equivalents of KC<sub>8</sub> as solids at ambient temperature. To the solids, toluene (3.4 mL) and then 6 equivalents of Me<sub>3</sub>SiCl was added under stirring using a glass stirbar. The mixture was kept at ambient temperature under stirring for 24 h, and then the mixture was filtered through a toluene rinsed plug. The combined amber filtrate was evaporated under reduced pressure and was assessed by <sup>1</sup>H-NMR.

**Catalytic N<sub>2</sub> silylation to tris(trimethylsilyl)amine using Fe<sub>3</sub>Br<sub>3</sub>L.** KC<sub>8</sub> (45.0 mg, 333 μmol) was suspended in 1.80 mL of the desired solvent (toluene, THF, or diethyl ether) under stirring with a glass stirbar. To this slurry, chlorotrimethylsilane (Me<sub>3</sub>SiCl, 42.2 μL, 333 μmol) was added followed by 0.200 mL of a 3.3 mmol L<sup>-1</sup> solution of Fe<sub>3</sub>Br<sub>3</sub>L in toluene. The system was kept at room temperature for 24 h, then filtered to afford a clear filtrate. The presence of N(SiMe<sub>3</sub>)<sub>3</sub> in the filtrate was confirmed by gas chromatography (Figure S11). To the filtrate, 0.100 mL of a 4 mol L<sup>-1</sup> HCl solution in 1,4-dioxane was added and, after 5 min, volatiles were removed to afford white solids. The resulting solid was dissolved in dimethylsulfoxide-*d*<sub>6</sub> with 1,3,5-trimethoxybenzene as an internal standard to quantify ammonium. The experiments were performed in triplicate for the values presenting an error bar.

**Filtration experiments.** KC<sub>8</sub> (11.2 mg, 83.2 μmol) was suspended in 1.80 mL of the desired solvent (toluene or diethyl ether) under stirring with a glass stirbar. To this slurry, Me<sub>3</sub>SiCl (10.5 μL, 83.2 μmol) was added followed by 0.200 mL of a 3.3 mmol L<sup>-1</sup> solution of Fe<sub>3</sub>Br<sub>3</sub>L in toluene. The system was kept at room temperature for 6 h, then filtered to afford a dark residue and a pale yellow filtrate. To the isolated residue and filtrate, KC<sub>8</sub> (33.8 mg, 250 μmol) and Me<sub>3</sub>SiCl (31.5 μL, 250 μmol) were added. To the residue, 1.80 mL of the desired solvent was also combined. Both systems were kept under stirring at room temperature for an extra 18 h. Ammonium was quanti-

fied as described above. In toluene, the filtrate and residue resulted in 25 and 7  $\text{NH}_4^+$  equiv./Fe, respectively (22% of heterogeneous activity). In diethyl ether, the filtrate and residue resulted in 64 and 10  $\text{NH}_4^+$  equiv./Fe, respectively (13% of heterogeneous activity).

The same procedure was followed with an equimolar amount of iron as  $[\text{FeClL}']_2$ . In toluene, the filtrate and residue resulted in 20 and 7  $\text{NH}_4^+$  equiv./Fe, respectively (26% of heterogeneous activity). In diethyl ether, the filtrate and residue resulted in 37 and 19  $\text{NH}_4^+$  equiv./Fe, respectively (34% of heterogeneous activity).

**Catalytic  $\text{N}_2$  silylation to  $\text{N}(\text{SiMe}_3)_3$  using other triiron compounds.** An analogous procedure was used by using 3.3  $\text{mmol L}^{-1}$  solutions of the desired complexes in place of the  $\text{Fe}_3\text{Br}_3\text{L}$  solution. The reaction was stopped after 24 h at room temperature. Ammonium was quantified as described above. The experiments were performed in triplicate.

**Synthesis of  $\text{Fe}_3(\mu_3\text{-N})\text{L}$ .** A 20 mL scintillation vial was charged with  $\text{Fe}_3\text{Br}_2(\mu_3\text{-N})\text{L}$  (300 mg, 295  $\mu\text{mol}$ ), 15 mL PhMe, and a Pyrex magnetic stir bar. To this was added 600  $\mu\text{L}$  (0.600 mmol)  $\text{KHB}(\text{sec-Bu})_3$  (1.0 M in THF) and immediate effervescence was observed. The reaction was allowed to stir at room temperature for 4 h, upon which a gradual color change from dark orange-red to dark yellow-orange was observed. The reaction mixture was filtered through a Celite plug and volatiles removed under reduced pressure to yield a tacky brown solid. The solid was extracted with 2 x 5 mL n-hexane and dried under reduced pressure. The resulting solid was dissolved in the minimum amount of benzene and lyophilized to yield a brown flocculent powder. Single crystals suitable for X-ray diffraction were obtained vial slow evaporation from either a saturated benzene solution or saturated toluene solution.  $^1\text{H NMR}$  (500 MHz,  $\text{C}_6\text{D}_6$ , 298 K):  $\delta = 54.0$  (s, br, 3H), 29.8 (s, 18H), 16.5 (s, br, 12H), -20.0 (s, br, 18H), -71.9 (s, br, 12 H).  $\mu_{\text{eff}}$  ( $\text{C}_6\text{D}_6$ , 298 K) = 5.70  $\mu\text{B}$ . ATR-IR ( $\text{cm}^{-1}$ ): 2950(s), 2940(s), 2864(s), 1525(s), 1458(vs), 1431(s), 1399(vs), 1374(s), 1336(s), 1014(w), 929(vw), 770(vw), 735(vw).

**Synthesis of  $\text{Fe}_3\text{O}_3\text{L}$ .** A 50 mL Schlenk flask was charged with  $\text{Fe}_3\text{H}_3\text{L}$  (240 mg, 280  $\mu\text{mol}$ ), a Teflon-coated stir bar, and THF (20 mL). The solution was degassed by the freeze-pump-thaw method and then exposed to a slow flow of  $\text{O}_2$  for 2 minutes with stirring. The flask was closed and the reaction was stirred for 2 hours. A rapid color change from dark red-orange to dark red occurring upon stirring. After this time the reaction was evaporated and the residue was dissolved in boiling toluene. Cooling the solution to  $-35^\circ\text{C}$  yielded dark red crystals (63.5 mg, 25%) after 2 d.  $^1\text{H NMR}$  (500 MHz, THF- $d_8$ , 298 K):  $\delta = 42.6$  (12H), 6.88 (12H), 1.27 (18H), 1.19 (18H), -14.2 (3H).  $\mu_{\text{eff}}$  (THF- $d_8$ , 298 K) = 4.4  $\mu\text{B}$ . ATR-IR ( $\text{cm}^{-1}$ ): 1528, 1463, 1430, 1396, 1374, 1336, 1018, 748, 729. UV-vis (THF; nm ( $\epsilon$ ,  $\text{M}^{-1}\text{cm}^{-1}$ ): 315 ( $3.20(4) \times 10^4$ ), 405 ( $1.28(2) \times 10^4$ ), 545 ( $2.3(3) \times 10^3$ ). HRMS (ESI+) m/z calcd for  $(\text{M}+\text{H}^+)$   $[\text{C}_{45}\text{H}_{64}\text{Fe}_3\text{N}_6\text{O}_3]^+$ : 904.3083, found 904.2939.

**Synthesis of  $\text{Fe}_3\text{Cl}_3\text{L}$ .** A 20 mL scintillation vial was charged with  $\text{H}_3\text{L}$  (100 mg, 145  $\mu\text{mol}$ ), a Teflon-coated stir bar, and THF (4.0 mL) and sealed with a Teflon-coated cap. The suspension was added BnK (60.0 mg, 0.460 mmol) at ambient temperature and stirred for 15 min. At this point, the reaction was charged with  $\text{FeCl}_2 \cdot 1.5\text{THF}$  (110 mg, 0.467 mmol) rapidly turning orange-red and stirred at ambient temperature for 12 h. The suspension was filtered through a plug of celite, evaporated, dissolved in benzene, and filtered through a second plug of celite. Slow evaporation of this solution yielded orange crystals (45.7 mg, 33%) after 4 weeks. The solid-state structure illustrates an idealized  $\text{C}_{2v}$  species at 100 K, while the compound is  $\text{D}_{3h}$  on the  $^1\text{H NMR}$  method timescale at ambient temperature.  $^1\text{H NMR}$  ( $\text{C}_6\text{D}_6$ ):  $\delta = 182$  (12H), -7.98 (18H), -14.0 (12H), -43.1 (18H), -51.7 (3H).  $\mu_{\text{eff}}$  ( $\text{C}_6\text{D}_6$ , 298 K) = 7.2  $\mu\text{B}$ . ATR-IR ( $\text{cm}^{-1}$ ): 1518, 1456, 1429, 1391, 1372, 1329, 1067, 1015, 733, 723  $\text{cm}^{-1}$ . UV-vis (THF; nm ( $\epsilon$ ,  $\text{M}^{-1}\text{cm}^{-1}$ ): 318 ( $1.23(3) \times 10^5$ ), 413 ( $4.0(5) \times 10^3$ ). HRMS (ESI+) m/z calcd  $(\text{M}+\text{H}_2\text{O}-\text{Cl}^-)$   $[\text{C}_{45}\text{H}_{65}\text{Cl}_2\text{Fe}_3\text{N}_6\text{O}]^+$ : 943.2640, found 943.2558.

## Characterization of New Compounds

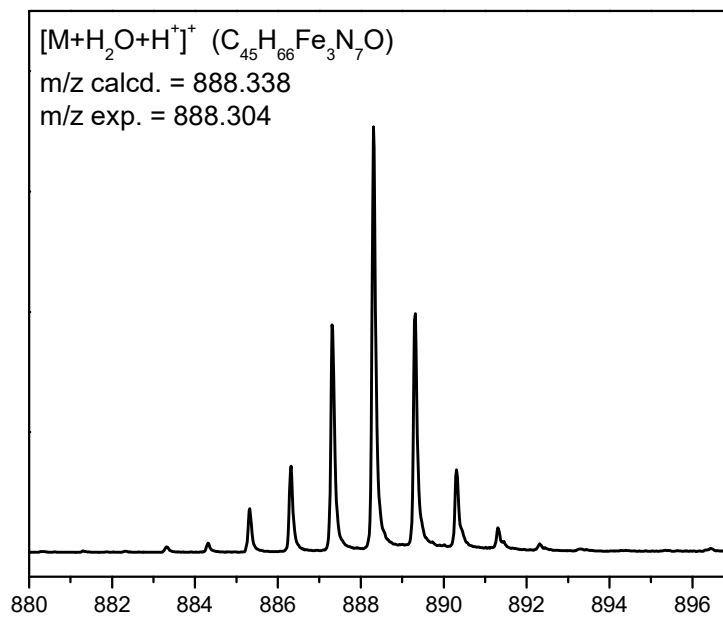

**Figure S1.** ESI-MS spectrum of  $Fe_3(\mu_3-N)L$  in THF (positive mode).

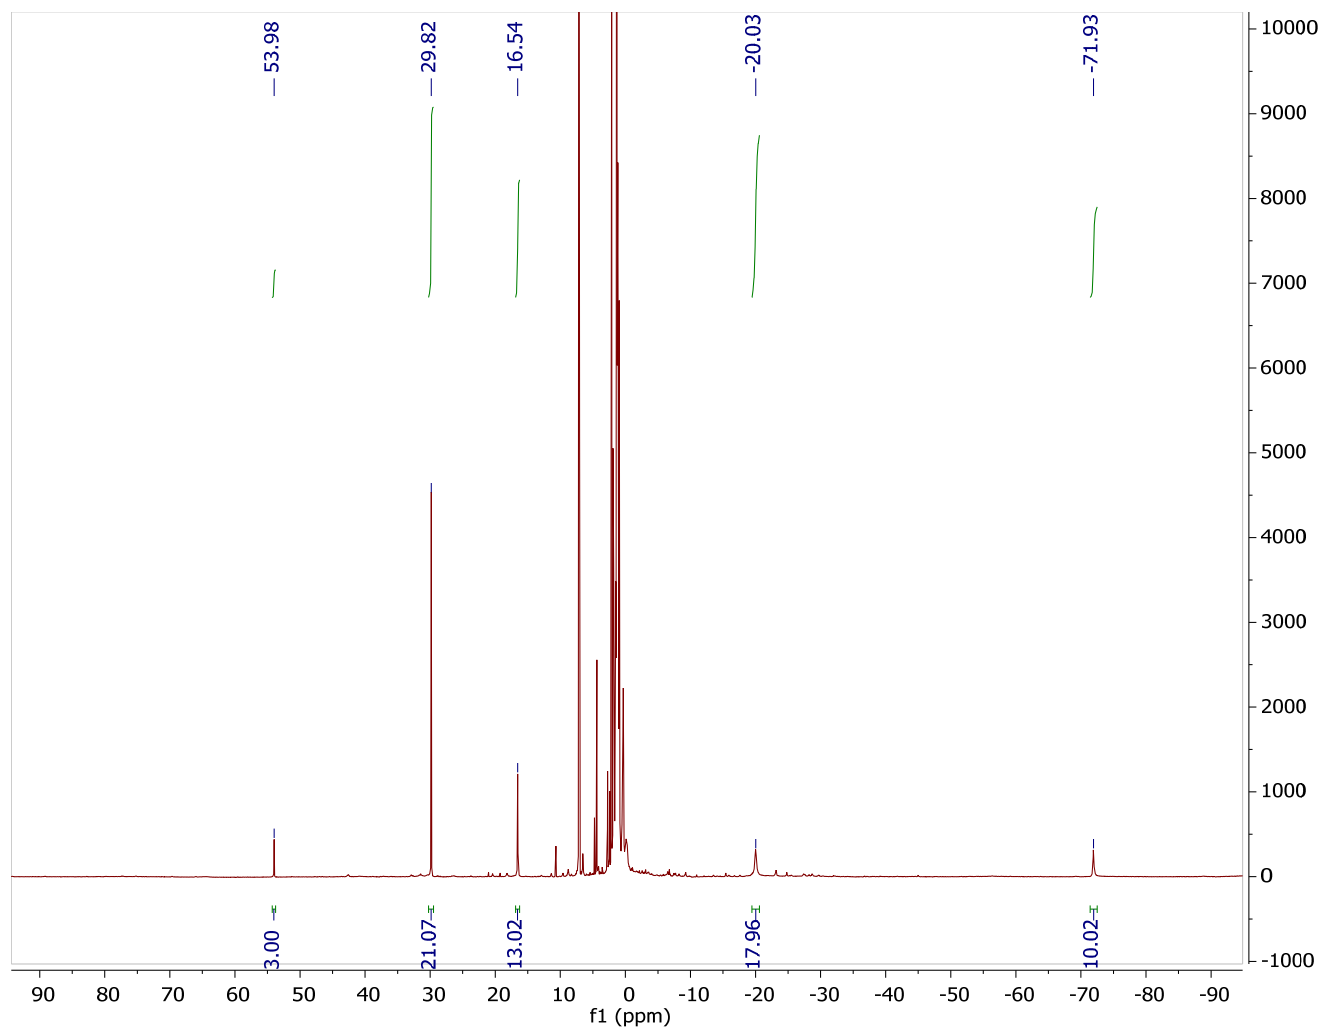

**Figure S2.**  $^1\text{H}$  NMR spectrum of  $\text{Fe}_3(\mu_3\text{-N})\text{L}$  in  $\text{C}_6\text{D}_6$ .

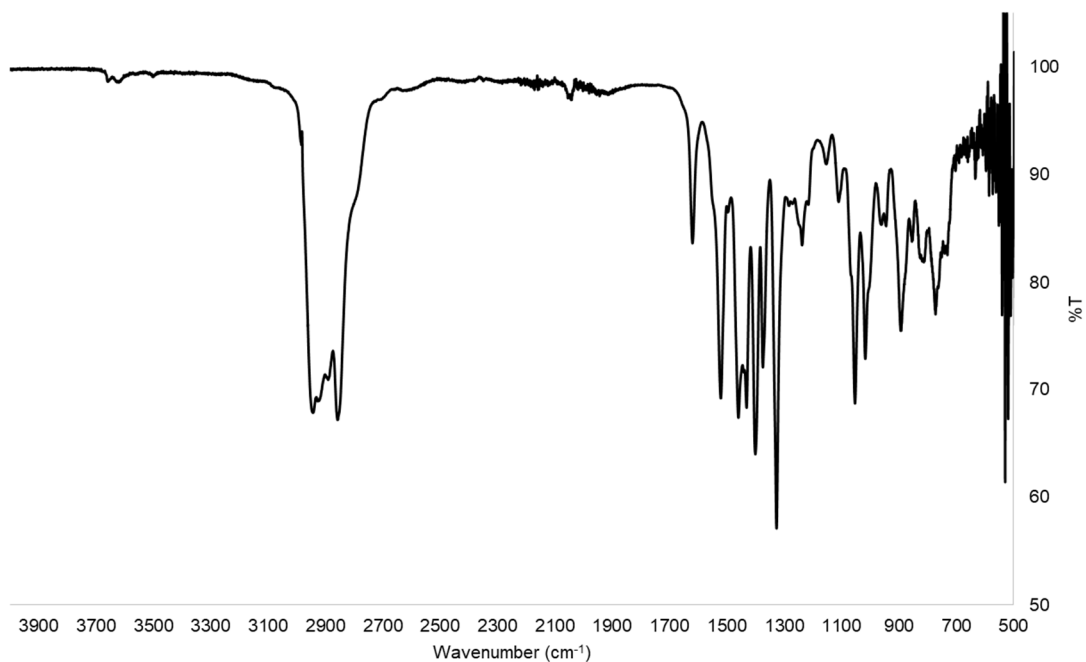

**Figure S3.** ATR-IR spectrum of  $\text{Fe}_3(\mu_3\text{-N})\text{L}$ , synthesized from  $\text{KHB}(\text{sec-Bu})_3$  in toluene, recorded as a thin film.

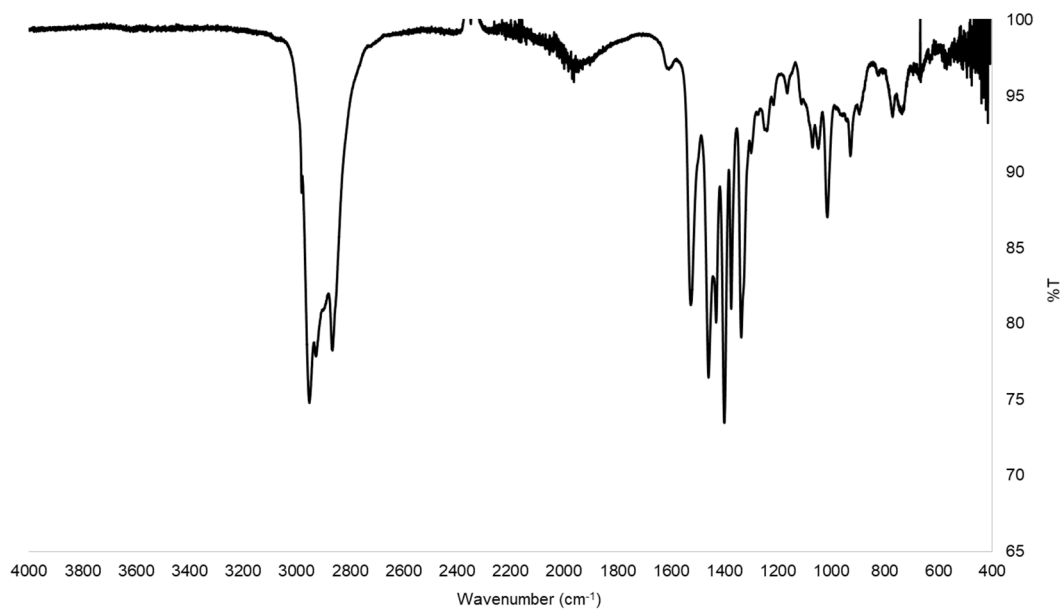

**Figure S4.** ATR-IR of  $\text{Fe}_3(\mu_3\text{-N})\text{L}$  synthesis from  $\text{KHBet}_3$  in toluene, recorded as a thin film.

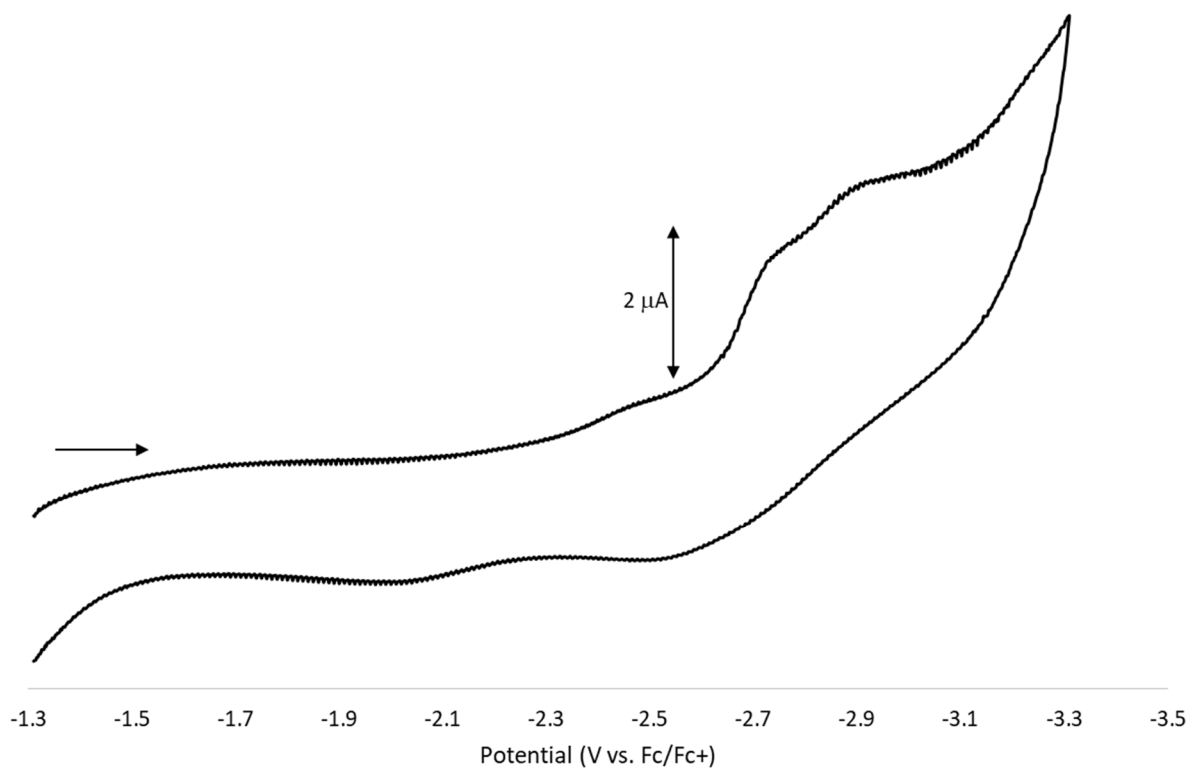

**Figure S5.** Cyclic Voltammetry (CV) of  $\text{Fe}_3(\mu_3\text{-N})\text{L}$ .

Arrows indicate scan direction and origin. Working electrode: Pt button. Auxiliary Electrode: Au ribbon. Reference Electrode: Ag/AgCl wire. Analyte Concentration: 2.0 mM.



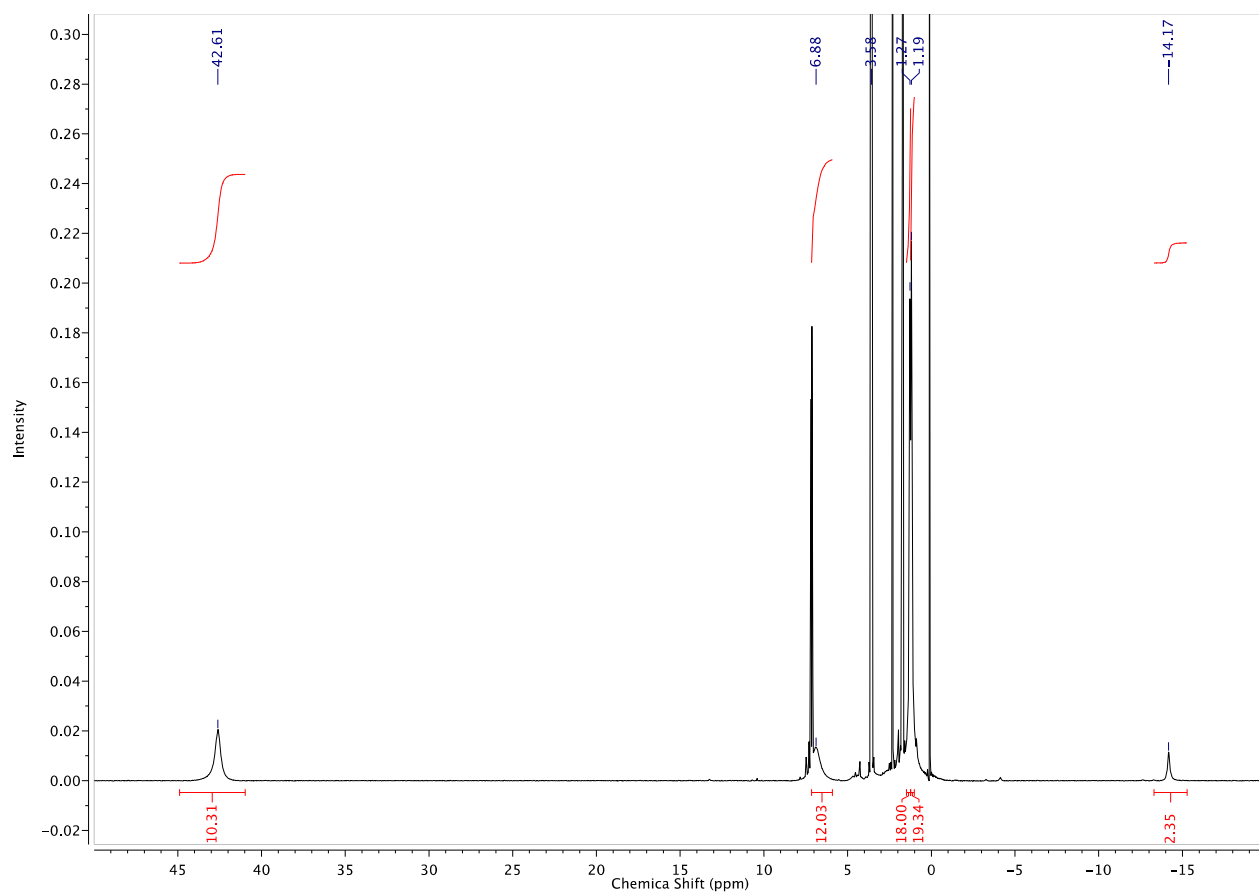

**Figure S6.** <sup>1</sup>H NMR spectrum of Fe<sub>3</sub>O<sub>3</sub>L in C<sub>6</sub>D<sub>6</sub>.

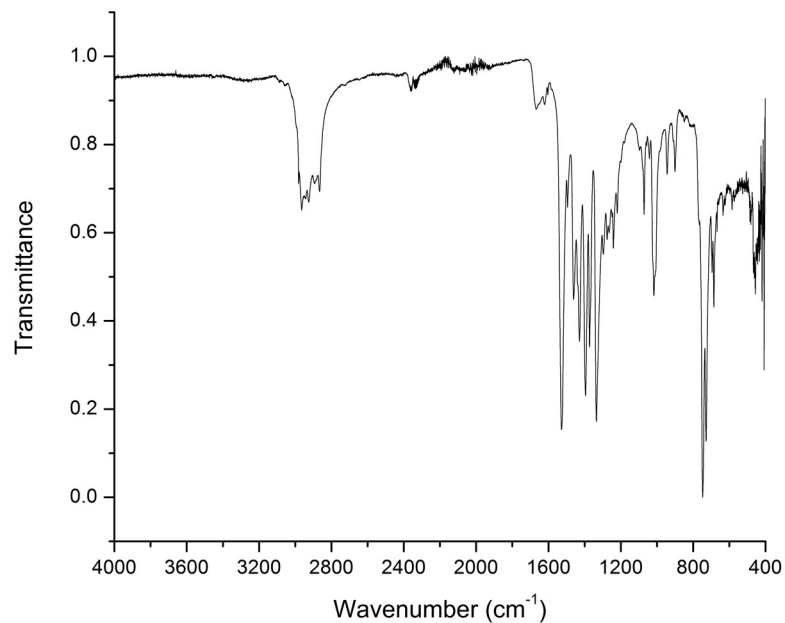

**Figure S7.** IR spectrum of Fe<sub>3</sub>O<sub>3</sub>L.

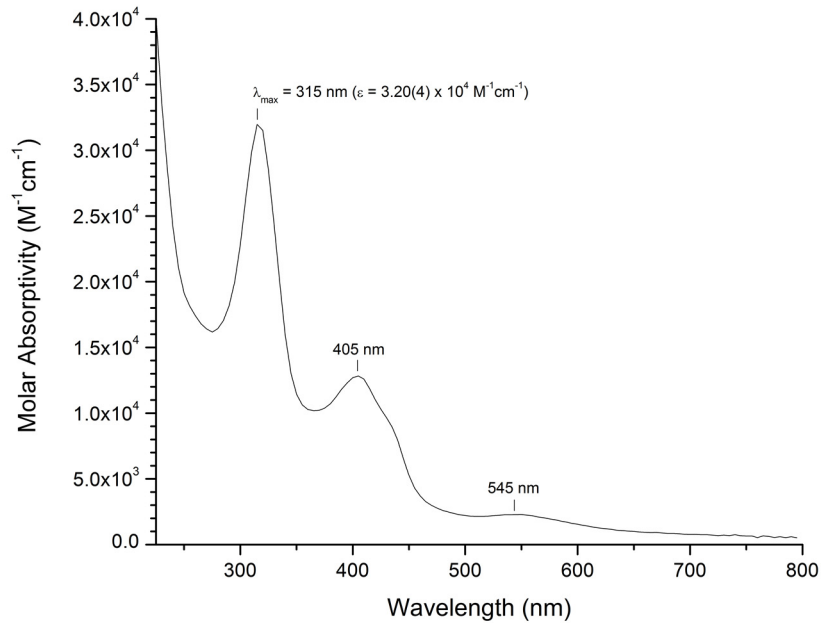

**Figure S8.** UV-Vis spectrum of Fe<sub>3</sub>O<sub>3</sub>L in THF.

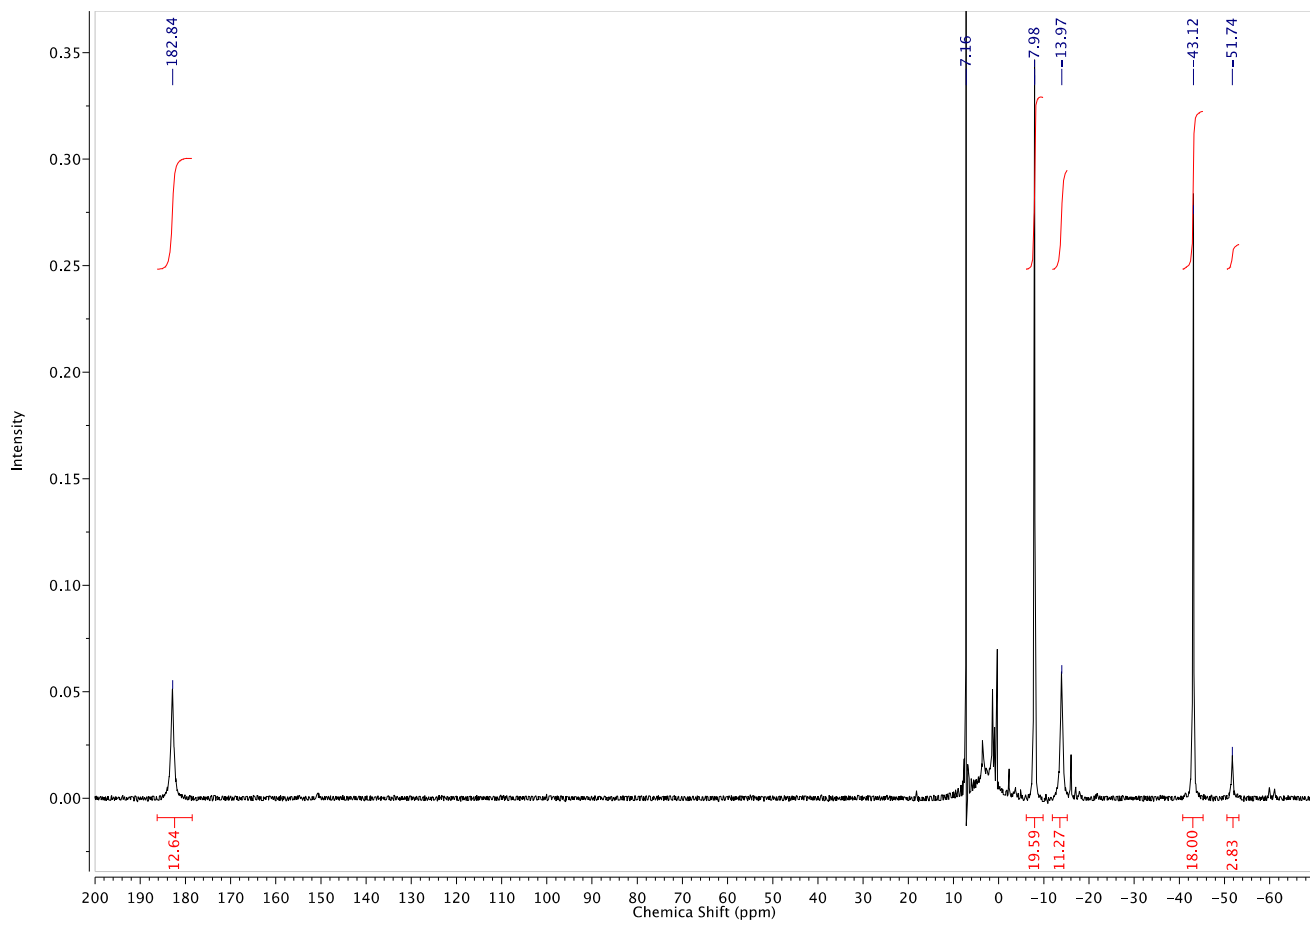

**Figure S9.**  $^1\text{H}$  NMR spectrum of  $\text{Fe}_3\text{Cl}_3\text{L}$  in  $\text{C}_6\text{D}_6$ .

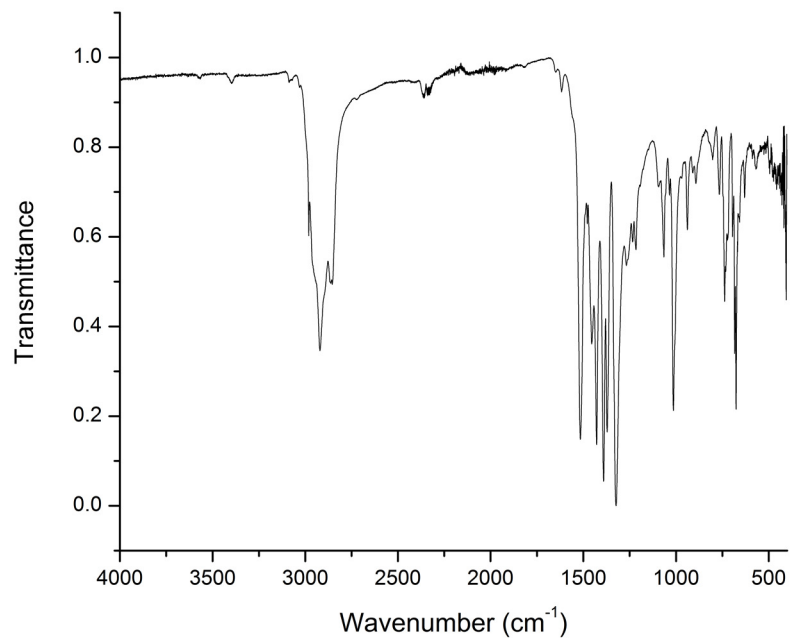

**Figure S10.** IR spectrum of Fe<sub>3</sub>Cl<sub>3</sub>L.

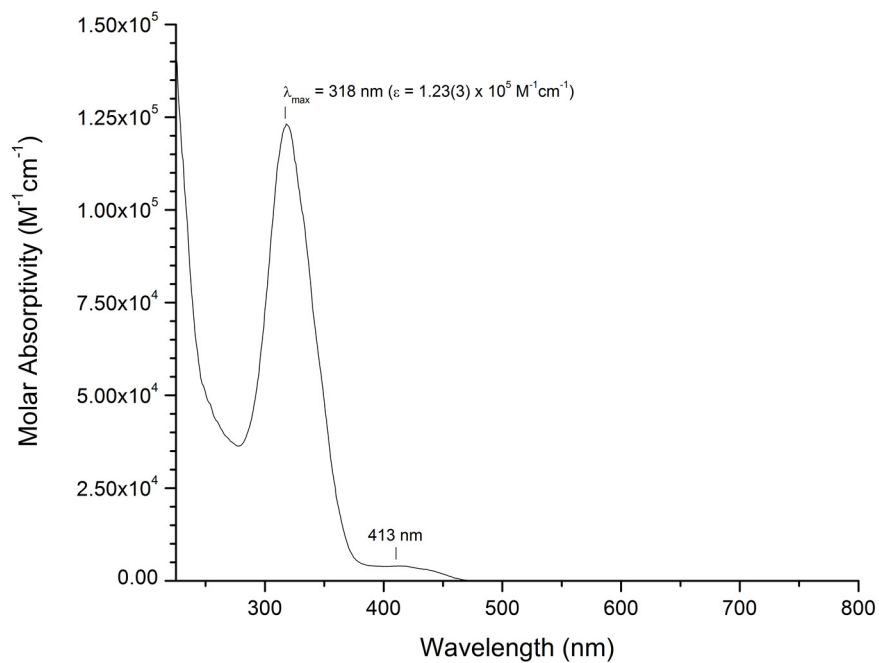

**Figure S11.** UV-Vis spectrum of Fe<sub>3</sub>Cl<sub>3</sub>L in THF.

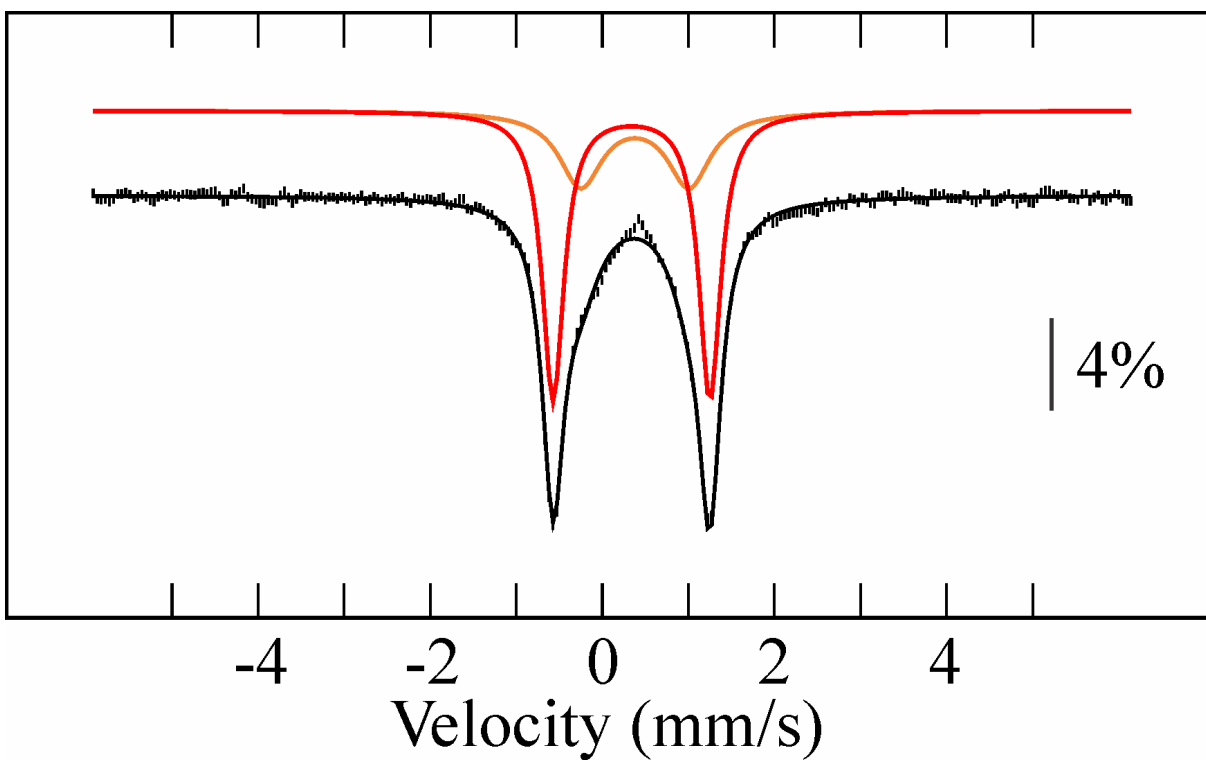

**Figure S12.** Mössbauer spectrum of Fe<sub>3</sub>O<sub>3</sub>L recorded at 80 K and zero-applied field. Black bars and colored lines represent the experimental and simulated quadrupole doublets, respectively. Solid black line is a composite spectrum obtained by combining individual doublets. The data suggest a  $C_{2v}$ -symmetric compound by this method and on this timescale.

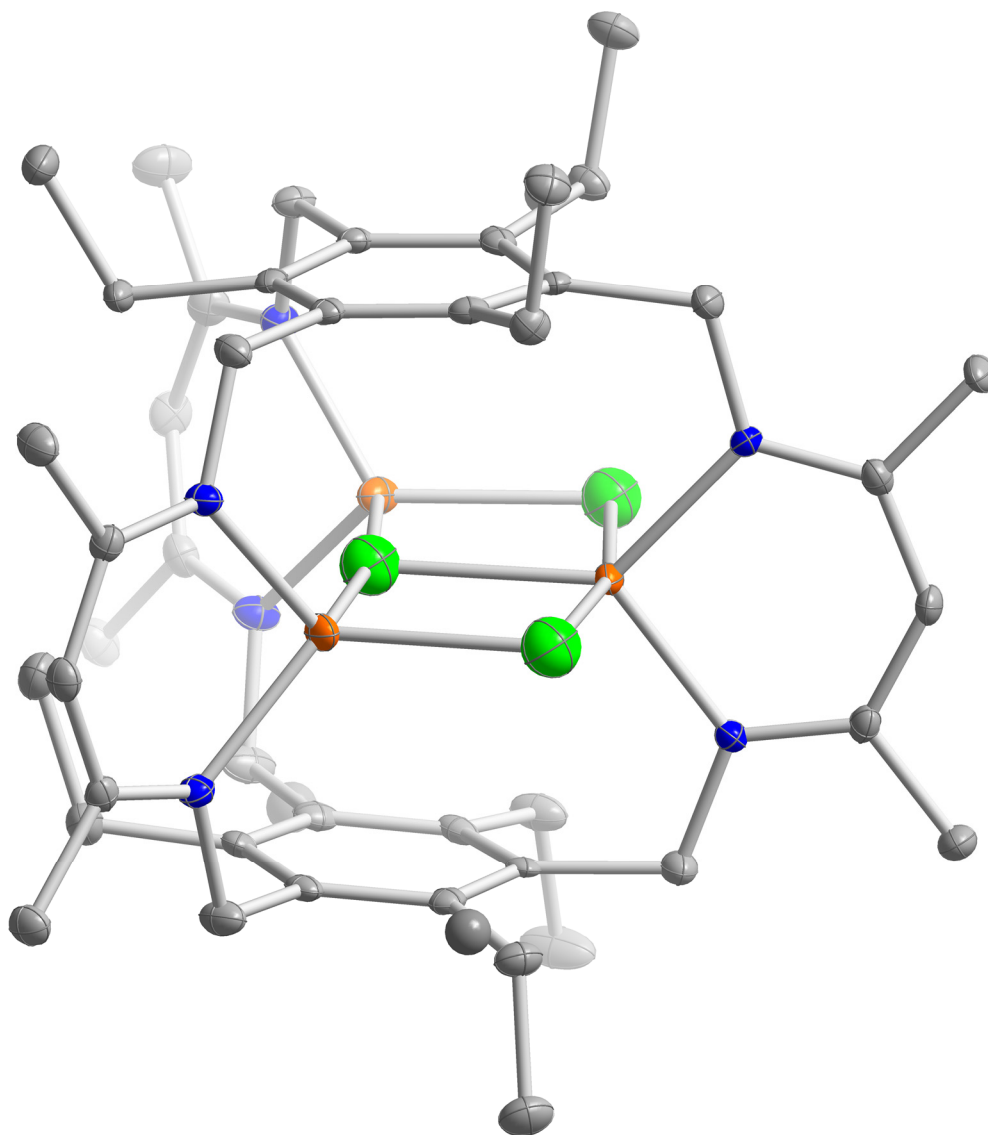

**Figure S13.** Single-crystal structure of Fe<sub>3</sub>Cl<sub>3</sub>L at 50% thermal ellipsoid.

The hydrogen atoms and benzene solvent molecules have been omitted for clarity. C, N, Cl, and Fe are depicted as grey, blue, green, and orange, respectively.

**Table S1.** 80 K Mössbauer parameters of complexes used as silylation catalysts.

| complex <sup>a</sup>                                             | $\delta$<br>(mm/s) | $\Delta E_Q$<br>(mm/s) | $\Gamma$<br>(mm/s) | Fe centers<br>/3 | Oxidation<br>number |
|------------------------------------------------------------------|--------------------|------------------------|--------------------|------------------|---------------------|
| Fe <sub>3</sub> Br <sub>3</sub> L                                | 1.02               | 1.79                   | 0.40               | 1                | Fe <sup>II</sup>    |
|                                                                  | 0.95               | 2.32                   | 0.40               | 1                | Fe <sup>II</sup>    |
|                                                                  | 0.90               | 2.78                   | 0.38               | 1                | Fe <sup>II</sup>    |
| Fe <sub>3</sub> F <sub>3</sub> L                                 | 1.00               | 2.54                   | 0.35               | 3                | Fe <sup>II</sup>    |
| Fe <sub>3</sub> H <sub>3</sub> L <sup>b</sup>                    | 0.77               | 2.26                   | 0.35               | 3                | Fe <sup>II</sup>    |
| Fe <sub>3</sub> H <sub>2</sub> (O <sub>2</sub> CH)L <sup>b</sup> | 0.82               | 2.45                   | 0.35               | 2                | Fe <sup>II</sup>    |
|                                                                  | 0.77               | 2.26                   | 0.35               | 1                | Fe <sup>II</sup>    |
| (FeCO) <sub>2</sub> Fe( $\mu_3$ -H)L <sup>b</sup>                | 0.66               | 2.60                   | 0.31               | 2                | Fe <sup>I</sup>     |
|                                                                  | 0.98               | 2.15                   | 0.27               | 1                | Fe <sup>II</sup>    |
| Fe <sub>3</sub> O <sub>3</sub> L                                 | 0.34               | 1.82                   | 0.30               | 2                | Fe <sup>III</sup>   |
|                                                                  | 0.38               | 1.26                   | 0.60               | 1                | Fe <sup>III</sup>   |
| Fe <sub>3</sub> S <sub>3</sub> L <sup>b</sup>                    | 0.28               | 1.33                   | 0.29               | 3                | Fe <sup>III</sup>   |

<sup>a</sup>We report only the complexes whose Mössbauer spectra could be entirely accounted for as the superposition of three quadrupole doublets with equal integrations, which we could confidently assign. <sup>b</sup>These parameters have already been reported in previous work (ESI references 3, 4, and 5).

## Catalytic silylation data

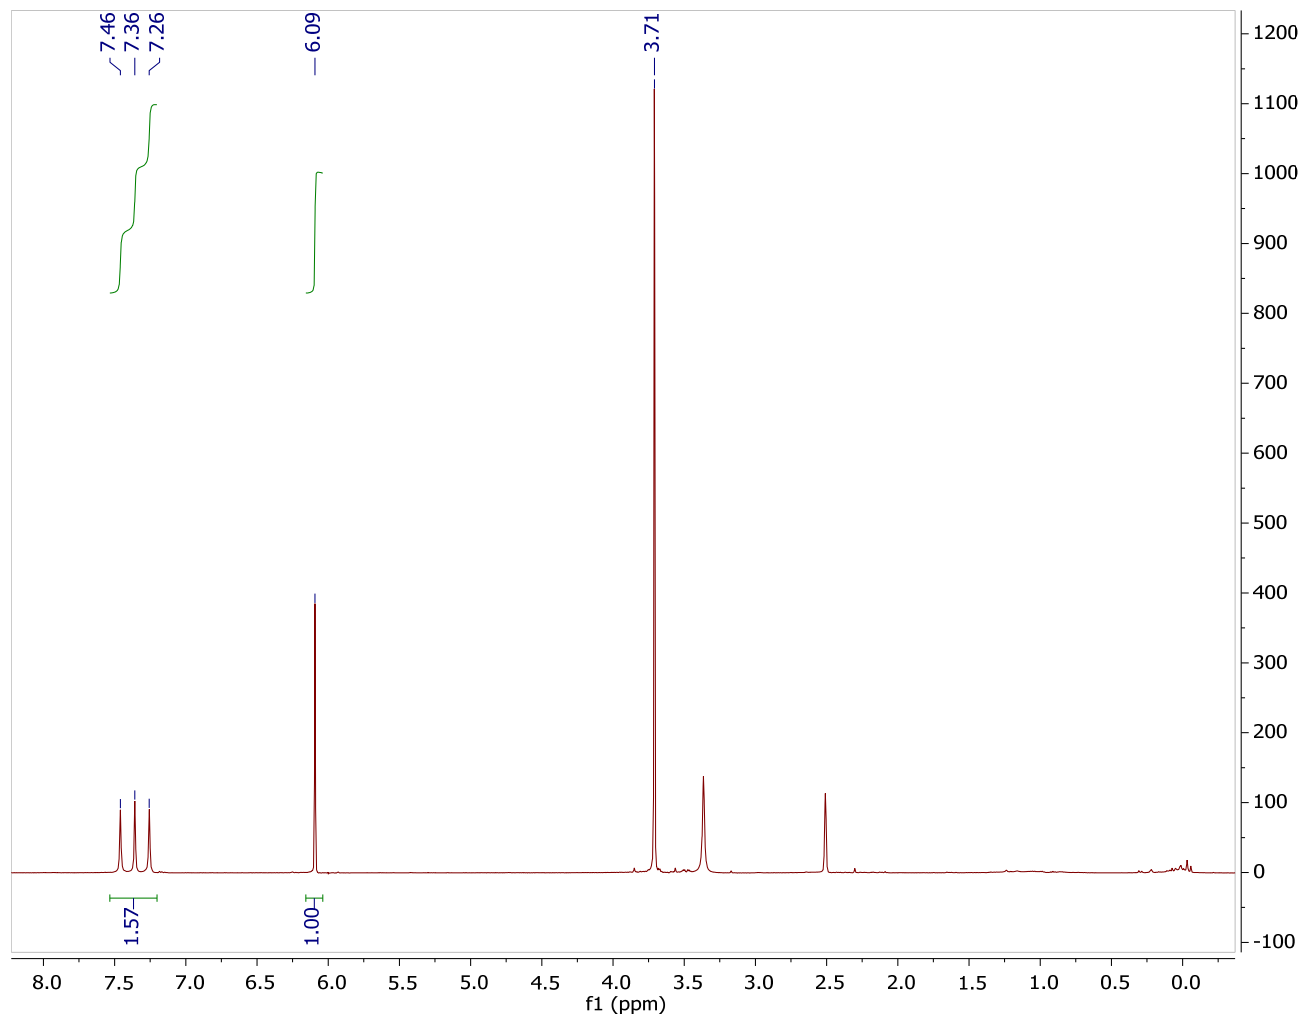

**Figure S14.**  $^1\text{H}$  NMR of the reaction between 500 equiv.  $\text{KC}_8$  and 500 equiv.  $\text{Me}_3\text{SiCl}$  with 0.2 mol %  $\text{Fe}_3(\mu_3\text{-N})\text{L}$  in  $\text{Et}_2\text{O}$  in  $\text{DMSO-}d_6$  after  $\text{HCl}$  quenching.

Peaks at 6.09 and 3.71 ppm indicate 1,3,5-trimethoxybenzene internal standard.  $^1J_{\text{N-H}} = 51$  Hz.



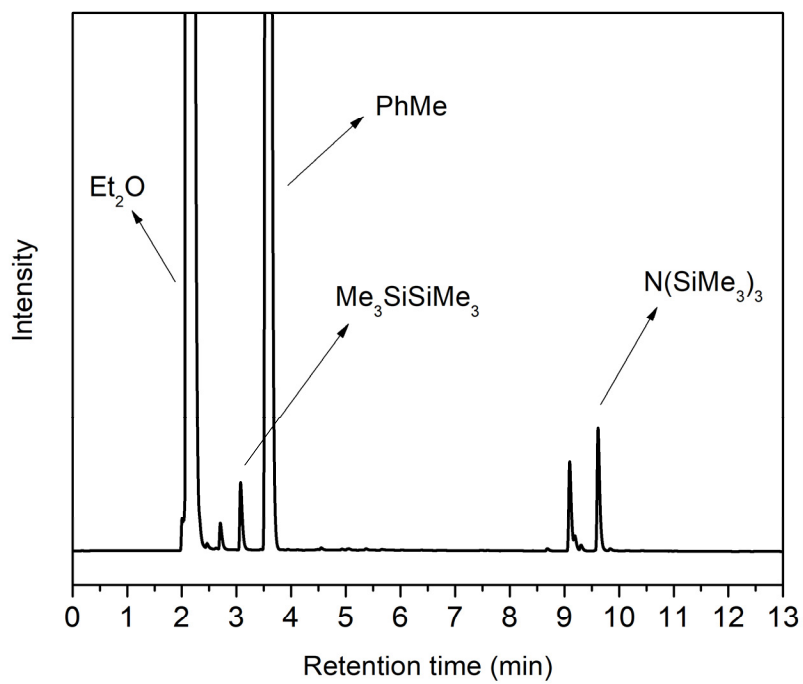

**Figure S15.** Gas chromatogram of the reaction mixture using 500 equiv.  $\text{KC}_8$  and 500 equiv.  $\text{Me}_3\text{SiCl}$  with 0.2 mol %  $\text{Fe}_3\text{Br}_3\text{L}$  in  $\text{Et}_2\text{O}$  after 24 h.

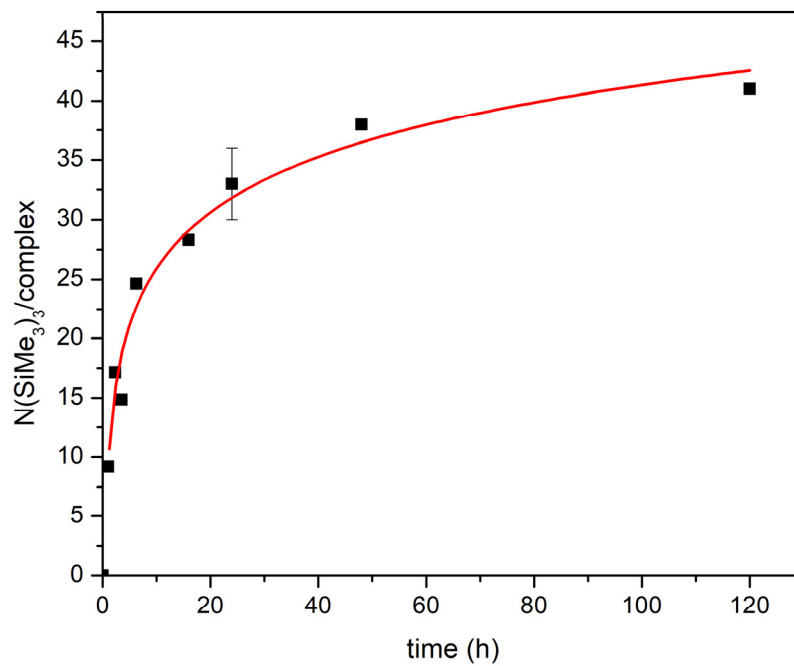

**Figure S16.** Influence of reaction time on  $N(\text{SiMe}_3)_3$  production.

The red trend line indicates the fit of the experimental data to a logarithmic growth curve. Reaction conditions: 500 equiv.  $\text{KC}_8$  and 500 equiv.  $\text{Me}_3\text{SiCl}$  (0.2 mol% catalyst loading) in toluene at room temperature.

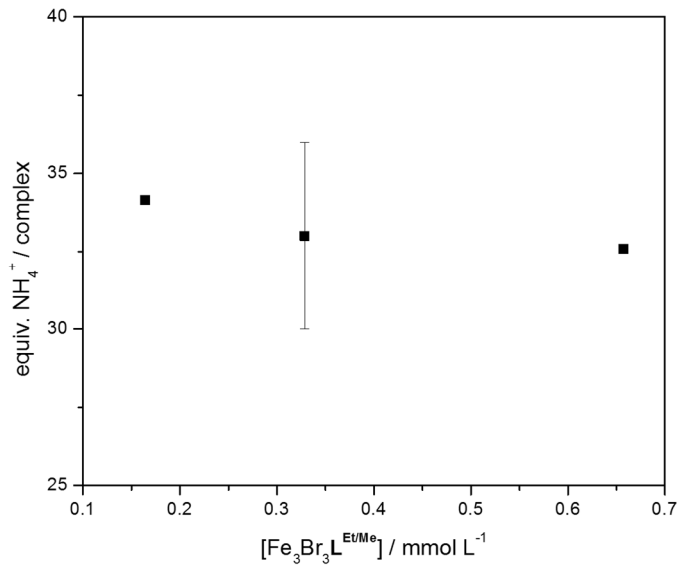

**Figure S17.** Influence of the concentration of the system on the yield of NH<sub>4</sub><sup>+</sup> obtained using Fe<sub>3</sub>Br<sub>3</sub>L.

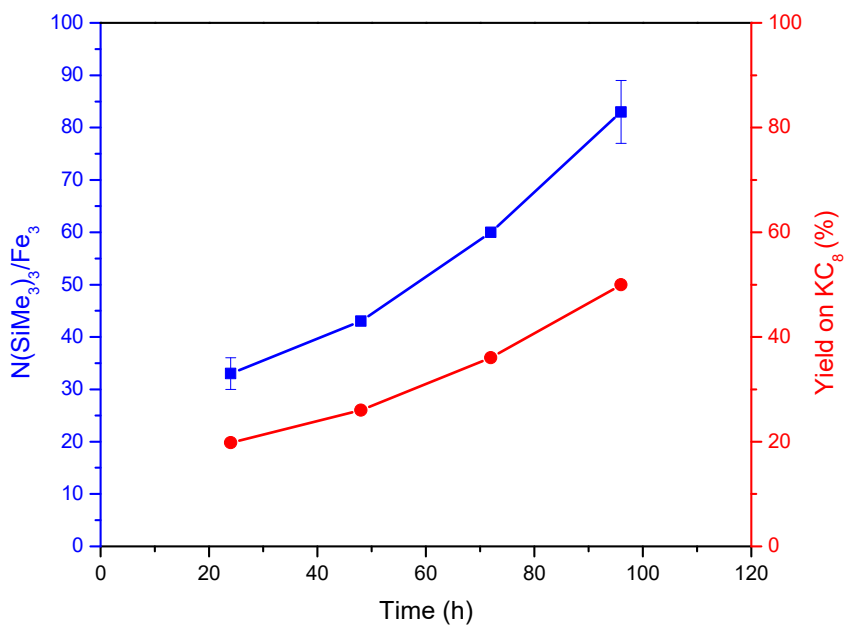

**Figure S18.** Influence of reaction time on N(SiMe<sub>3</sub>)<sub>3</sub> production at -34 °C in Et<sub>2</sub>O:PhMe = 9:1.

The blue points indicate the value of experimental data of N(SiMe<sub>3</sub>)<sub>3</sub> equiv. per complex. The red points indicate the corresponding yields based on KC<sub>8</sub>. Reaction conditions: 500 equiv. KC<sub>8</sub> and 500 equiv. Me<sub>3</sub>SiCl (0.2 mol% catalyst loading) in Et<sub>2</sub>O:PhMe = 9:1 at -34 °C.

**Table S2.** Catalytic performance of reported iron-based complexes for the silylation of N<sub>2</sub>.

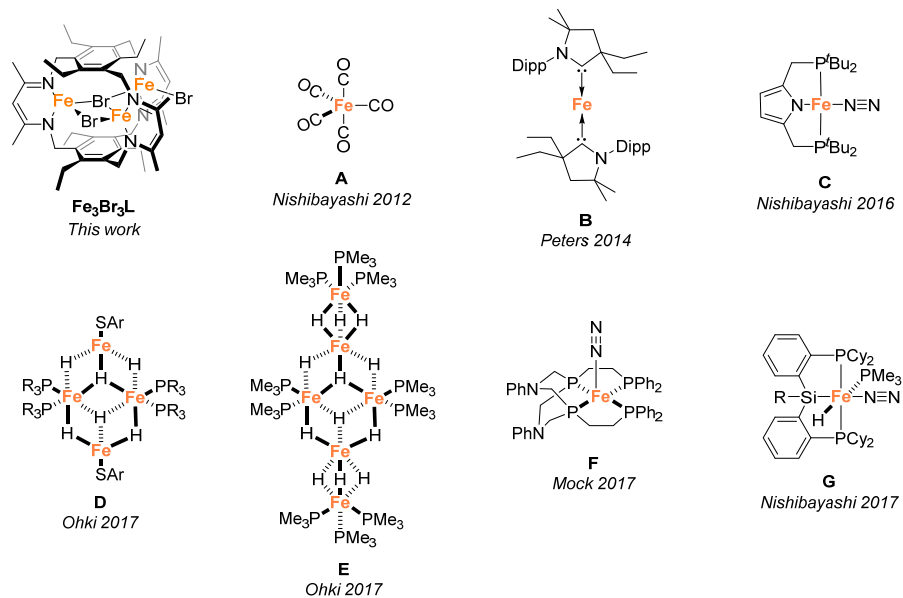

| Complex                                            | Reaction conditions |                       |        |          |                              | NH <sub>4</sub> <sup>+</sup> equiv./Fe | Yield on KC <sub>8</sub> (%) | Ref.             |
|----------------------------------------------------|---------------------|-----------------------|--------|----------|------------------------------|----------------------------------------|------------------------------|------------------|
|                                                    | Solvent             | PN <sub>2</sub> (atm) | Temp.  | Time (h) | KC <sub>8</sub> or Na equiv. |                                        |                              |                  |
| <b>Fe<sub>3</sub>Br<sub>3</sub>L</b>               | Toluene             | 1                     | r. t.  | 24       | 500                          | 11                                     | 20                           | <i>This work</i> |
|                                                    | Et <sub>2</sub> O   | 1                     | r. t.  | 24       | 500                          | 21                                     | 38                           |                  |
|                                                    | Et <sub>2</sub> O   | 1                     | r. t.  | 24       | 1800                         | 27                                     | 13                           |                  |
|                                                    | Et <sub>2</sub> O   | 1                     | -34 °C | 24       | 500                          | 8                                      | 14                           |                  |
|                                                    | Et <sub>2</sub> O   | 1                     | -34 °C | 96       | 500                          | 29                                     | 52                           |                  |
| <b>A</b>                                           | THF                 | 1                     | r. t.  | 20       | 600                          | 25                                     | 12                           | 7                |
| <b>B</b>                                           | Et <sub>2</sub> O   | 1                     | r. t.  | 24       | 600                          | 24                                     | 12                           | 8                |
|                                                    | Et <sub>2</sub> O   | 1                     | -78 °C | 24       | 600                          | 7                                      | 3                            |                  |
| <b>C</b>                                           | THF                 | 1                     | r. t.  | 20       | 600                          | 21                                     | 10                           | 9                |
| <b>D</b><br>(PR <sub>3</sub> =PMe <sub>3</sub> )   | DME                 | 1                     | r. t.  | 100      | 2400                         | 31                                     | 16                           | 10               |
| <b>D</b><br>(PR <sub>3</sub> =PMe <sub>2</sub> Ph) | DME                 | 1                     | r. t.  | 100      | 2400                         | 40                                     | 20                           |                  |
| <b>D</b><br>(PR <sub>3</sub> =PEt <sub>3</sub> )   | DME                 | 1                     | r. t.  | 100      | 2400                         | 40                                     | 20                           |                  |
| <b>E</b>                                           | DME                 | 1                     | r. t.  | 100      | 3600                         | 31                                     | 15                           |                  |
|                                                    | THF                 | 1                     | r. t.  | 100      | 3600                         | 13                                     | 6                            |                  |
| <b>F</b>                                           | Toluene             | 1                     | r. t.  | 24       | 500                          | 11                                     | 7                            | 11               |
|                                                    | Toluene             | 20                    | r. t.  | 24       | 500                          | 22                                     | 13                           |                  |
|                                                    | Toluene             | 100                   | r. t.  | 24       | 500                          | 38                                     | 23                           |                  |
|                                                    | Toluene             | 100                   | r. t.  | 24       | 1000                         | 65                                     | 19                           |                  |
| <b>G</b>                                           | THF                 | 1                     | r. t.  | 20       | 600                          | 15                                     | 7                            | 12               |
|                                                    | THF                 | 1                     | r. t.  | 20       | 600                          | 26                                     | 13                           |                  |

**Table S3.** Catalytic performance of selected complexes for the silylation of N<sub>2</sub> containing other metals.

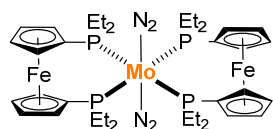

**H**  
Yoshizawa 2011

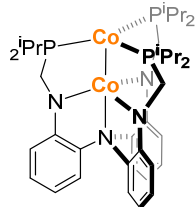

**I**  
Lu 2015

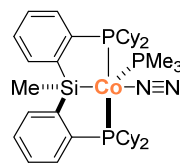

**J**  
Nishibayashi 2017

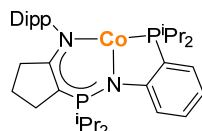

**K**  
Masuda 2018

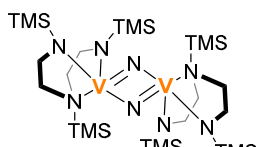

**L**  
Nishibayashi 2017

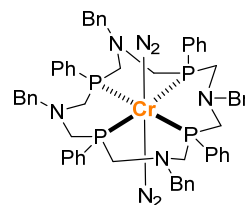

**M**  
Mock 2018

| Complex (M)   | Reaction conditions |                       |        |          |                              |                                       | Yield on KC <sub>8</sub> (%) | Ref. |
|---------------|---------------------|-----------------------|--------|----------|------------------------------|---------------------------------------|------------------------------|------|
|               | Solvent             | PN <sub>2</sub> (atm) | Temp.  | Time (h) | KC <sub>8</sub> or Na equiv. | NH <sub>4</sub> <sup>+</sup> equiv./M |                              |      |
| <b>H (Mo)</b> | THF                 | 1                     | r. t.  | 100      | 4000                         | 150                                   | 11                           | 13   |
|               | THF                 | 1                     | r. t.  | 200      | 8000                         | 226                                   | 8                            |      |
| <b>I (Co)</b> | THF                 | 1                     | r. t.  | 12       | 2000                         | 97                                    | 29                           | 14   |
|               | THF                 | 1                     | r. t.  | 24       | 4000                         | 163                                   | 24                           |      |
| <b>J (Co)</b> | THF                 | 1                     | r. t.  | 40       | 600                          | 41                                    | 20                           | 12   |
| <b>K (Co)</b> | THF                 | 1                     | -40 °C | 240      | 1500                         | 200                                   | 40                           | 15   |
|               | THF                 | 1                     | -40 °C | 312      | 3000                         | 270                                   | 27                           |      |
| <b>L (V)</b>  | THF                 | 1                     | r. t.  | 20       | 600                          | 24                                    | 12                           | 16   |
| <b>M (Cr)</b> | THF                 | 1                     | r. t.  | 16       | 100                          | 11                                    | 32                           | 17   |
|               | THF                 | 1                     | r. t.  | 16       | 100000                       | 17                                    | 0.05                         |      |
|               | THF                 | 1                     | r. t.  | 72       | 100000                       | 21                                    | 0.06                         |      |
|               | THF                 | 1                     | r. t.  | 32       | 200000                       | 34                                    | 0.05                         |      |

## Reactivity of triiron compounds under reducing conditions

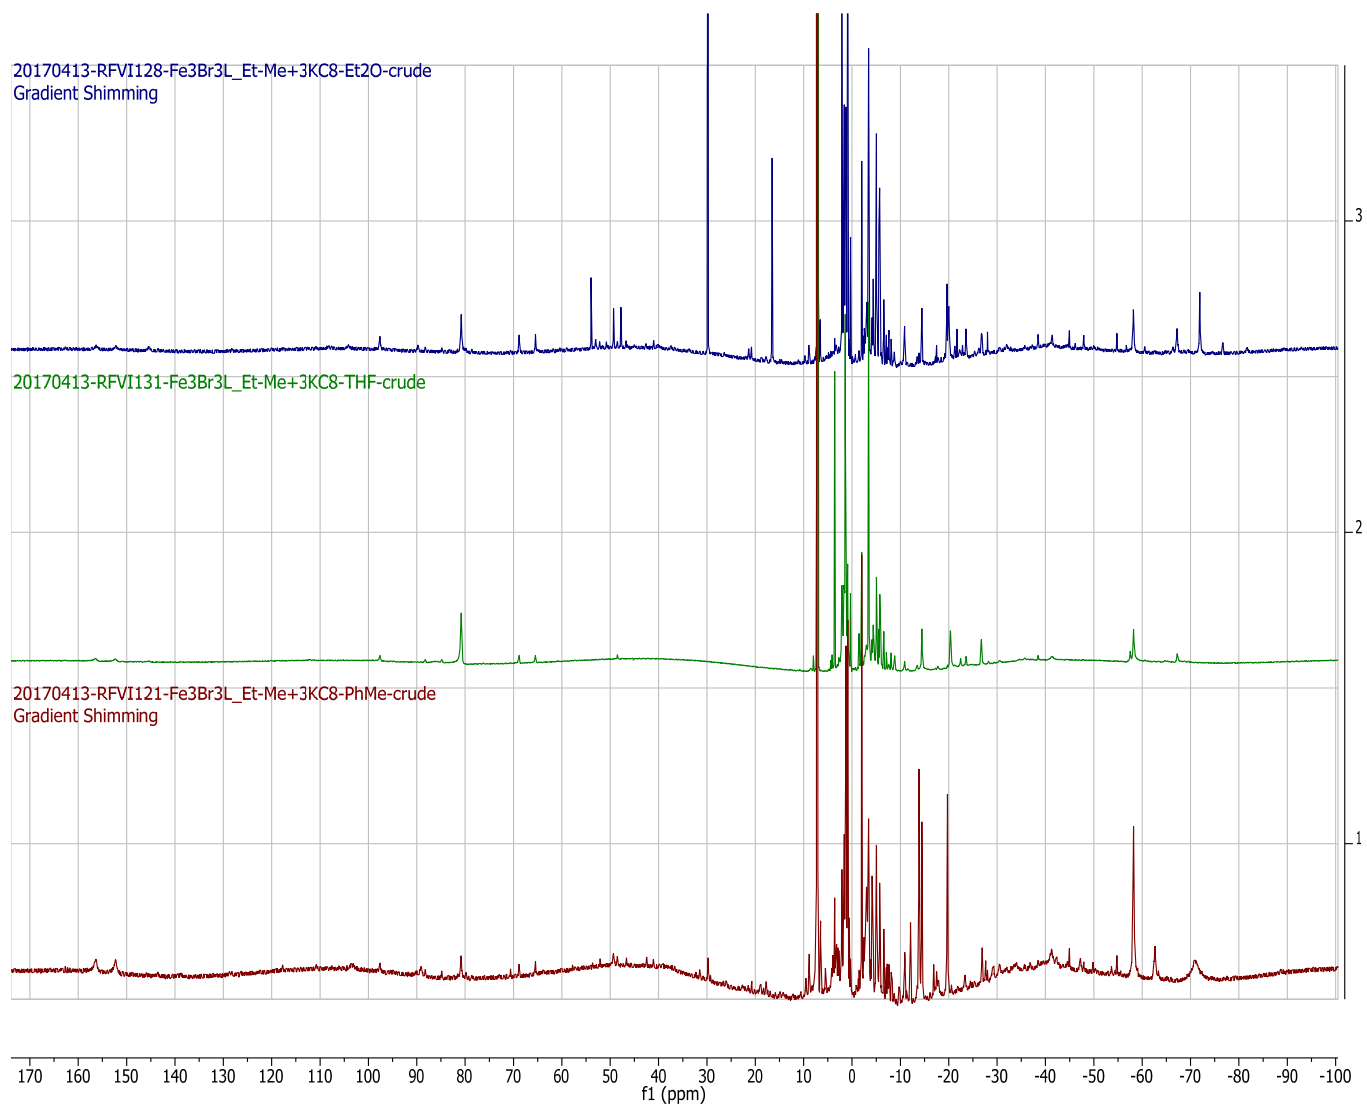

**Figure S19.**  $^1\text{H}$  NMR spectra in  $\text{C}_6\text{D}_6$  of  $\text{Fe}_3\text{Br}_3\text{L}$  with 3 equiv. of  $\text{KC}_8$  in toluene (bottom), THF (middle), and  $\text{Et}_2\text{O}$  (top).

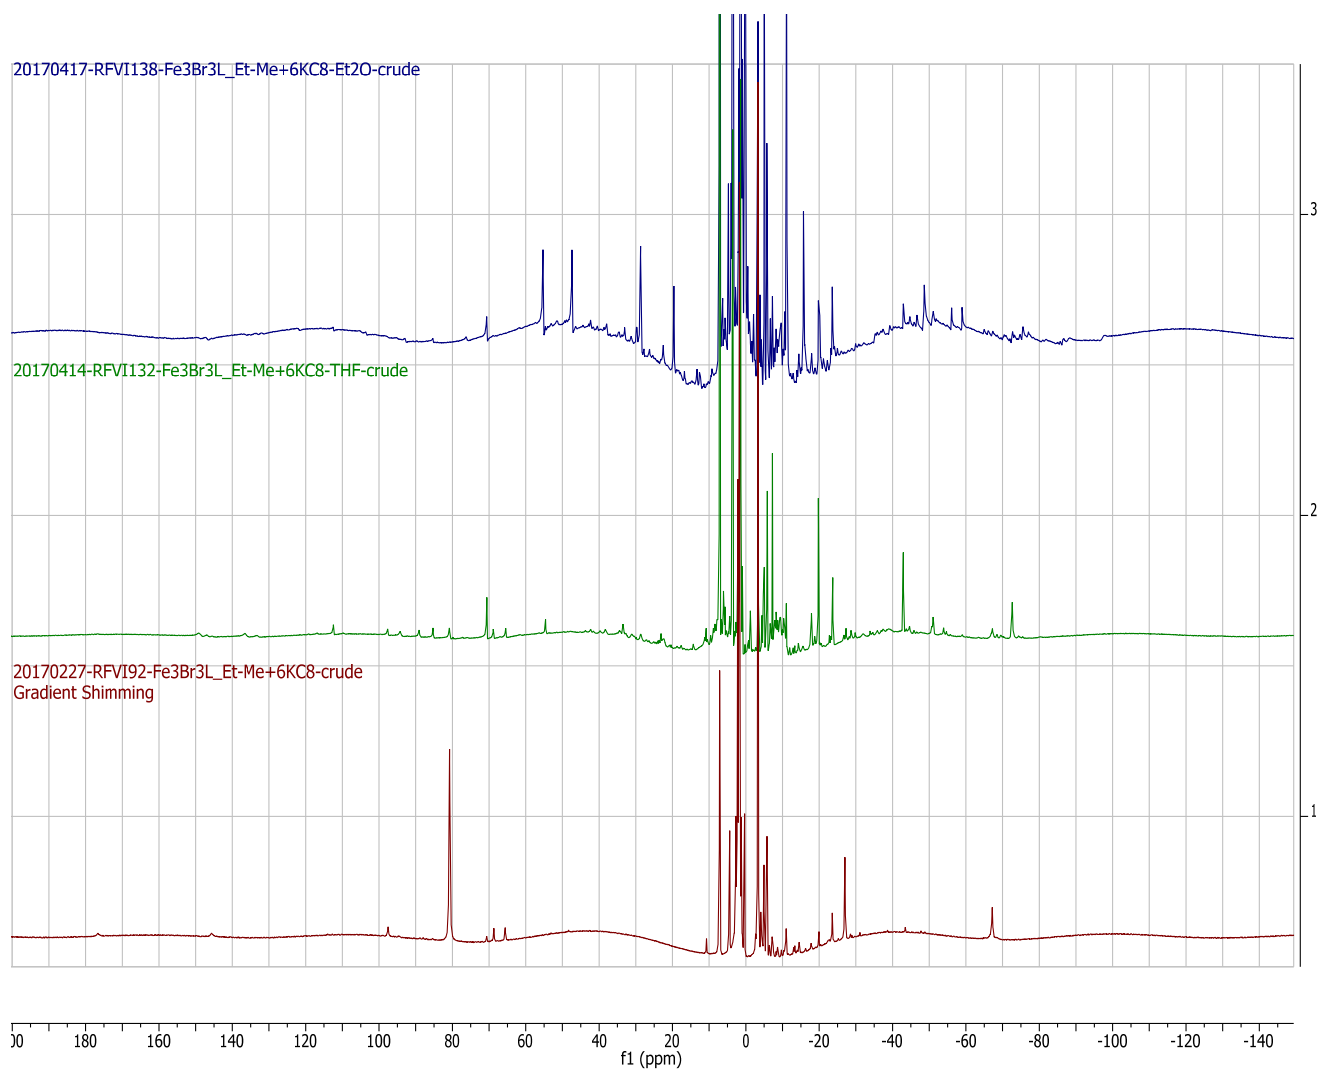

**Figure S20.** <sup>1</sup>H NMR spectra in C<sub>6</sub>D<sub>6</sub> of Fe<sub>3</sub>Br<sub>3</sub>L with 6 equiv. of KC<sub>8</sub> in toluene (bottom), THF (middle), and Et<sub>2</sub>O (top).

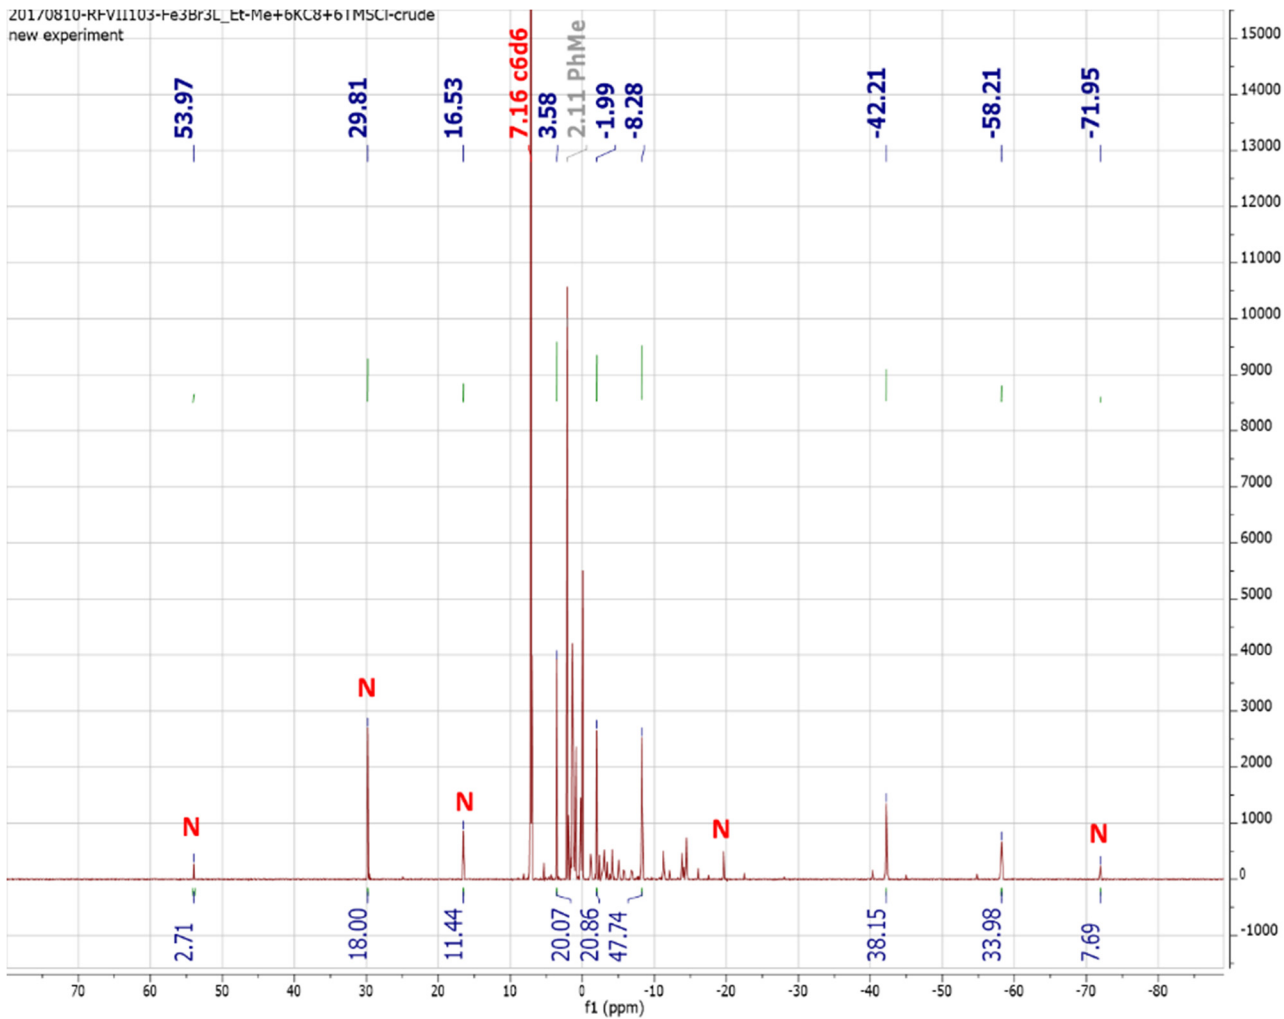

**Figure S21.**  $^1\text{H}$  NMR spectra in  $\text{C}_6\text{D}_6$  of  $\text{Fe}_3\text{Br}_3\text{L}$  with 6 equiv. of  $\text{KC}_8$  and  $\text{Me}_3\text{SiCl}$  in toluene at  $25^\circ\text{C}$  after 24 h. The peaks indicated with N are assigned to  $\text{Fe}_3(\mu_3\text{-N})\text{L}$ .



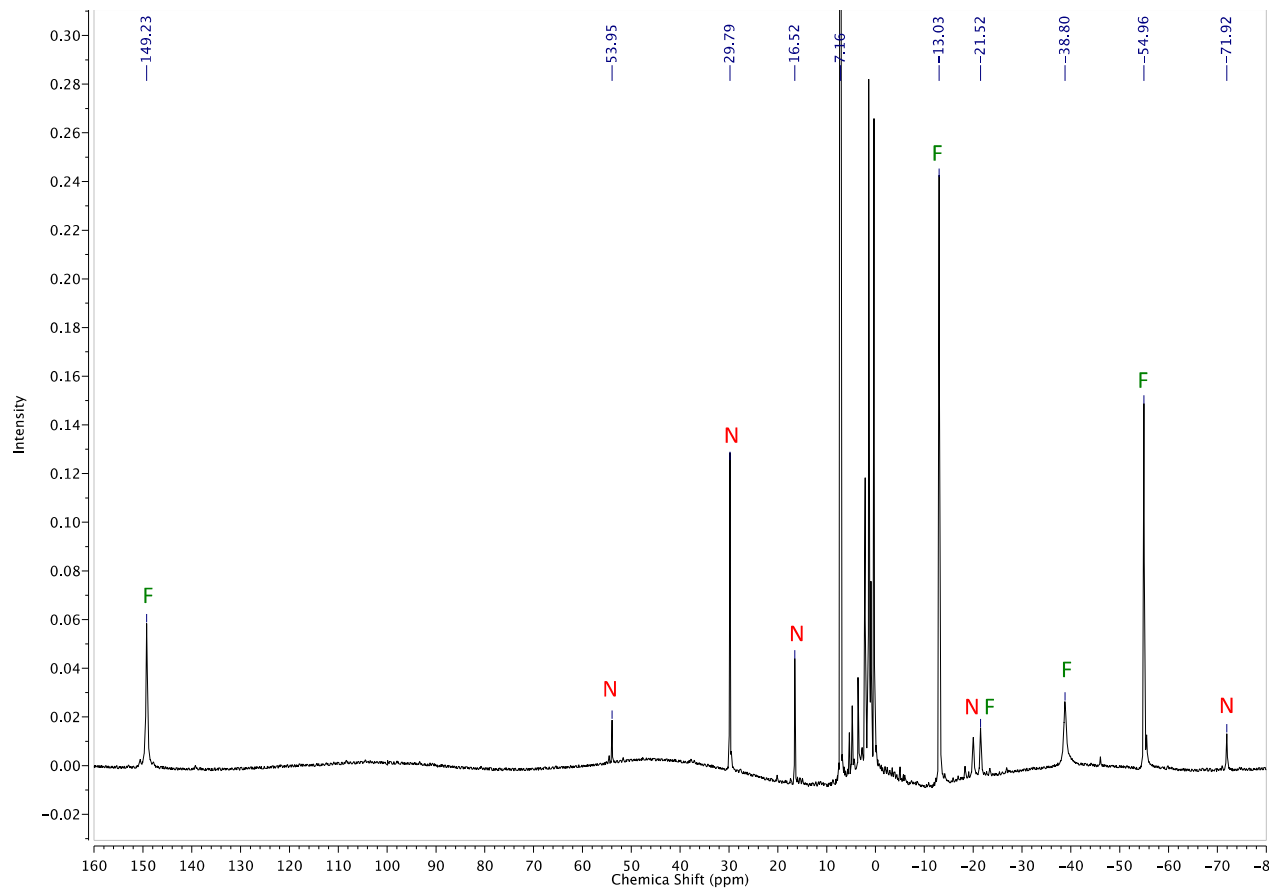

**Figure S22.**  $^1\text{H}$  NMR spectra in  $\text{C}_6\text{D}_6$  of  $\text{Fe}_3\text{F}_3\text{L}$  with 6 equiv. of  $\text{KC}_8$  and 6 equiv  $\text{Me}_3\text{SiCl}$  in toluene at  $25^\circ\text{C}$  after 24 h.

The peaks indicated with **F** and **N** are assigned to  $\text{Fe}_3(\mu_3\text{-N})\text{L}$ .

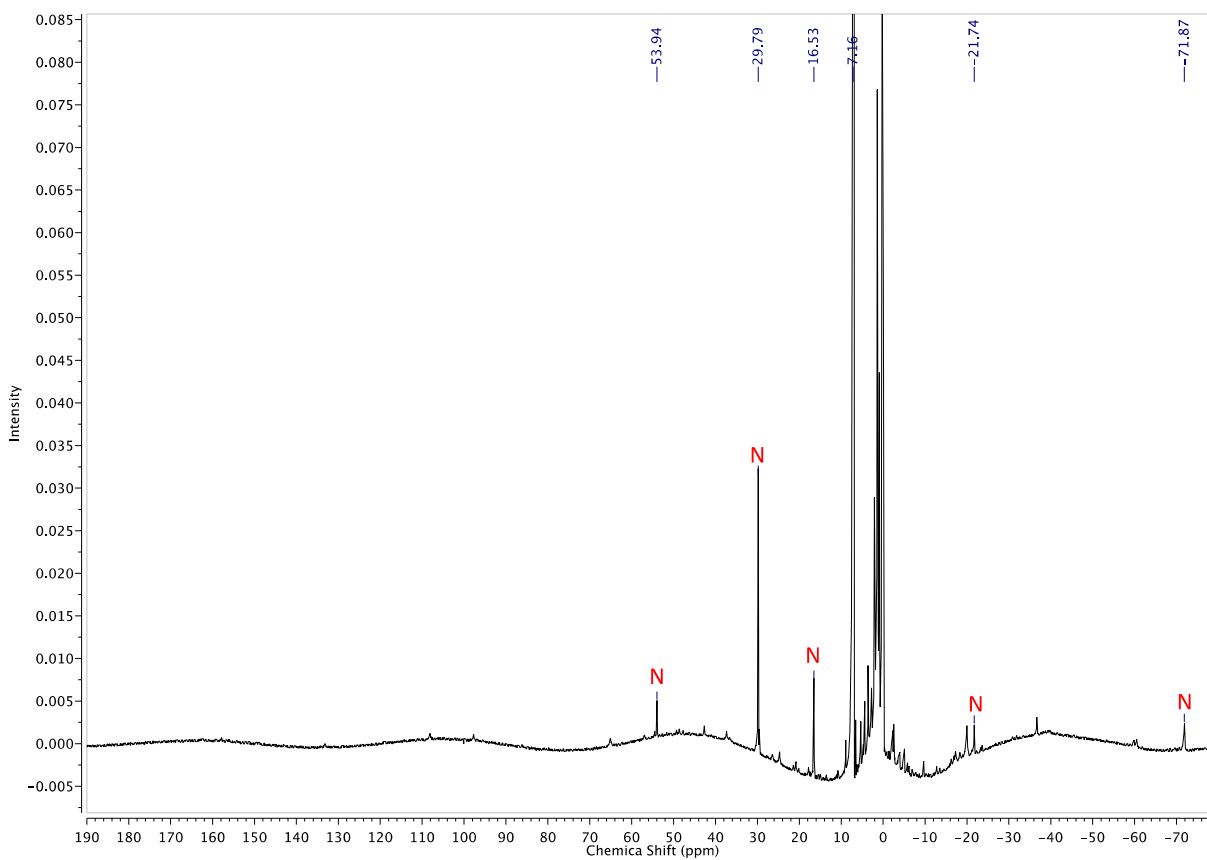

**Figure S23.**  $^1\text{H}$  NMR spectra in  $\text{C}_6\text{D}_6$  of  $\text{Fe}_3\text{Cl}_3\text{L}$  with 6 equiv. of  $\text{KC}_8$  and 6 equiv. of  $\text{Me}_3\text{SiCl}$  in toluene at  $25\text{ }^\circ\text{C}$  after 24 h.

The peaks indicated with **N** are assigned to  $\text{Fe}_3(\mu_3\text{-N})\text{L}$ .

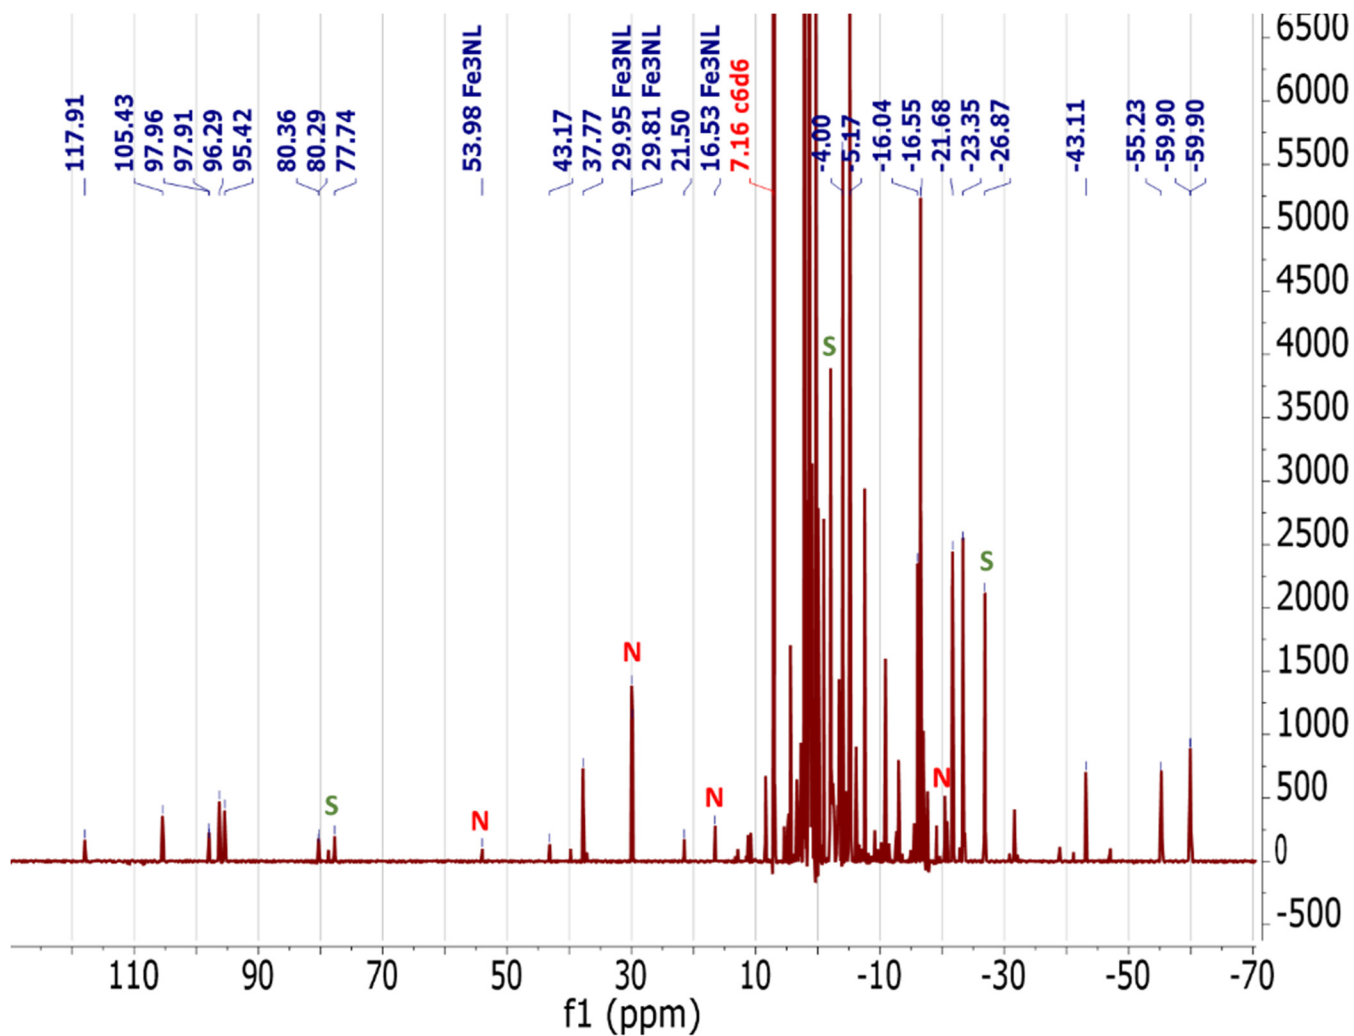

**Figure S24.**  $^1\text{H}$  NMR spectra in  $\text{C}_6\text{D}_6$  of  $\text{Fe}_3\text{S}_3\text{L}$  with 6 equiv. of  $\text{KC}_8$  and 6 equiv. of  $\text{Me}_3\text{SiCl}$  in toluene at  $25\text{ }^\circ\text{C}$  after 24 h.

The peaks indicated with **S** and **N** are assigned to  $\text{Fe}_3\text{S}_3\text{L}$  and  $\text{Fe}_3(\mu_3\text{-N})\text{L}$ , respectively.

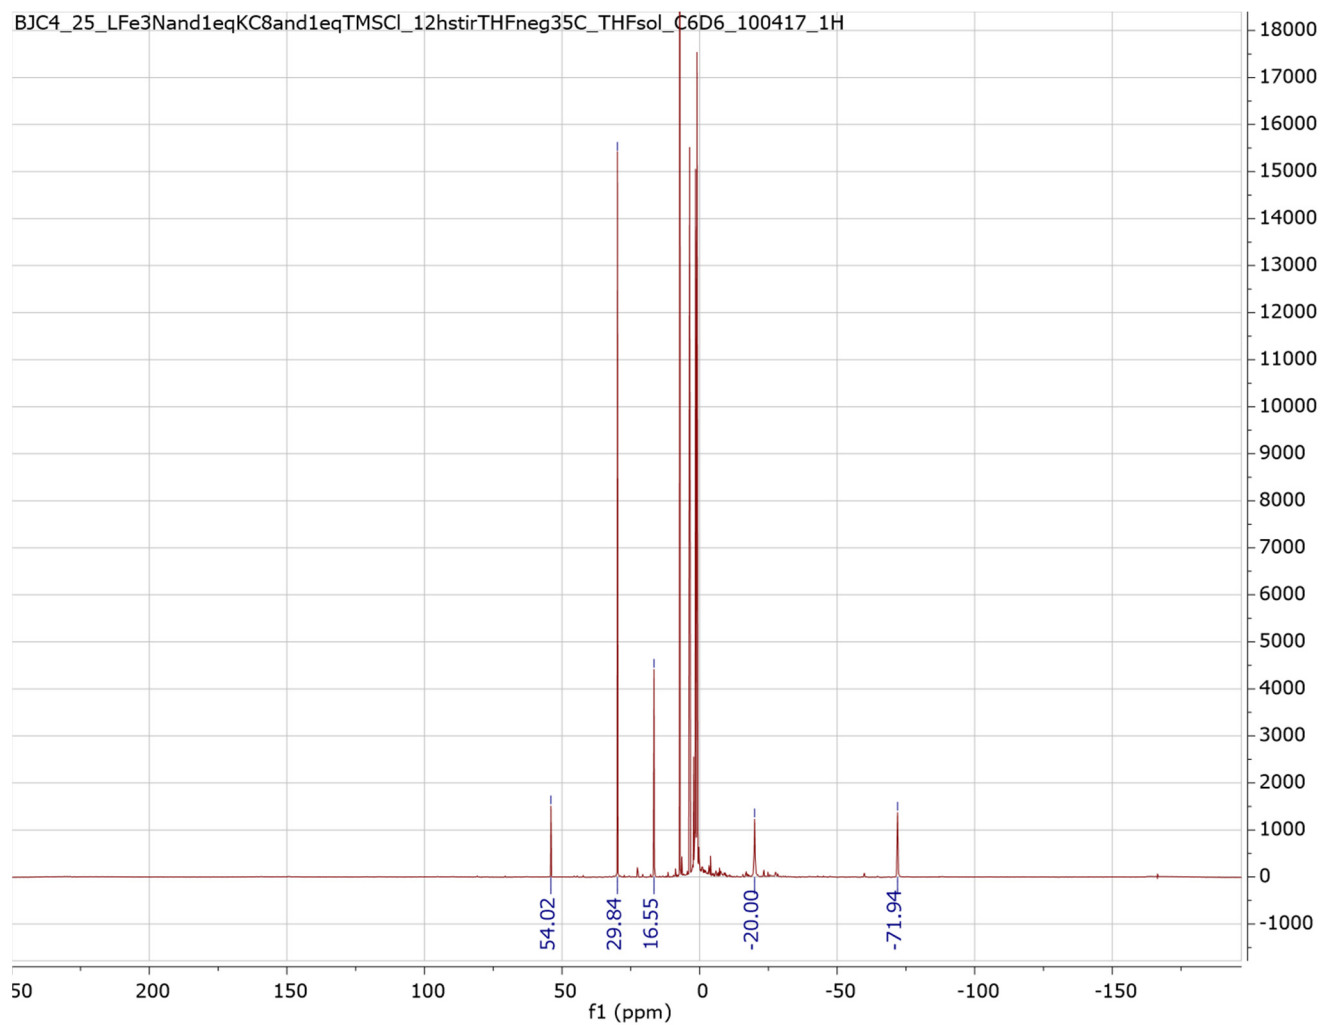

**Figure S25.** <sup>1</sup>H NMR of the reaction between Fe<sub>3</sub>(μ<sub>3</sub>-N)L, 1 equiv. KC<sub>8</sub> and 1 equiv. Me<sub>3</sub>SiCl in THF at -35 °C recorded in C<sub>6</sub>D<sub>6</sub>.

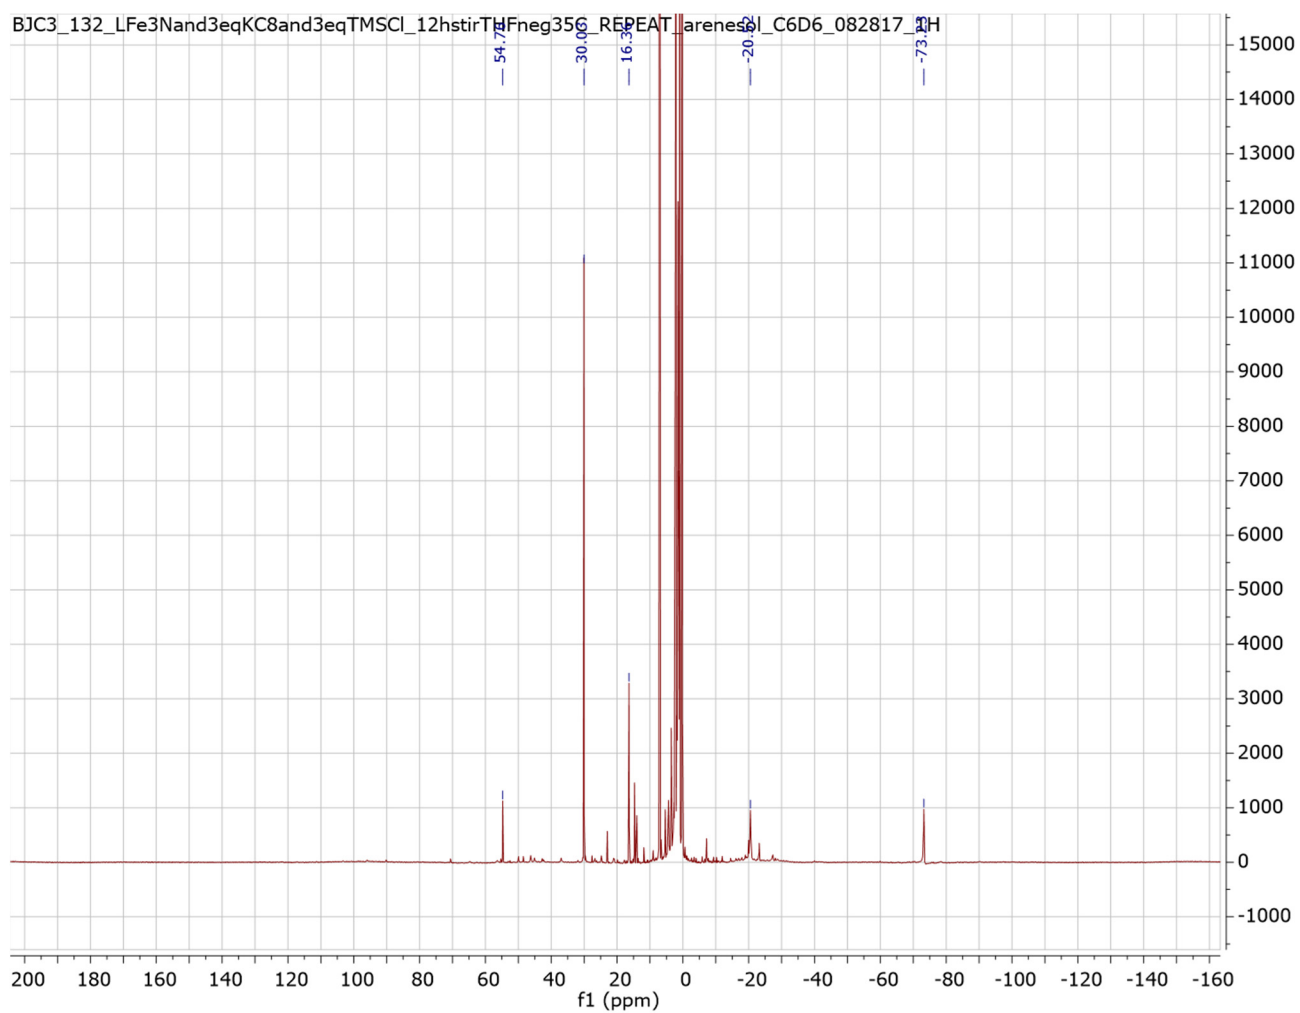

**Figure S26.**  $^1\text{H}$  NMR of the reaction between  $\text{Fe}_3(\mu_3\text{-N})\text{L}$ , 3 equiv.  $\text{KC}_8$  and 3 equiv.  $\text{Me}_3\text{SiCl}$  in THF at  $-35\text{ }^\circ\text{C}$  recorded in  $\text{C}_6\text{D}_6$ .

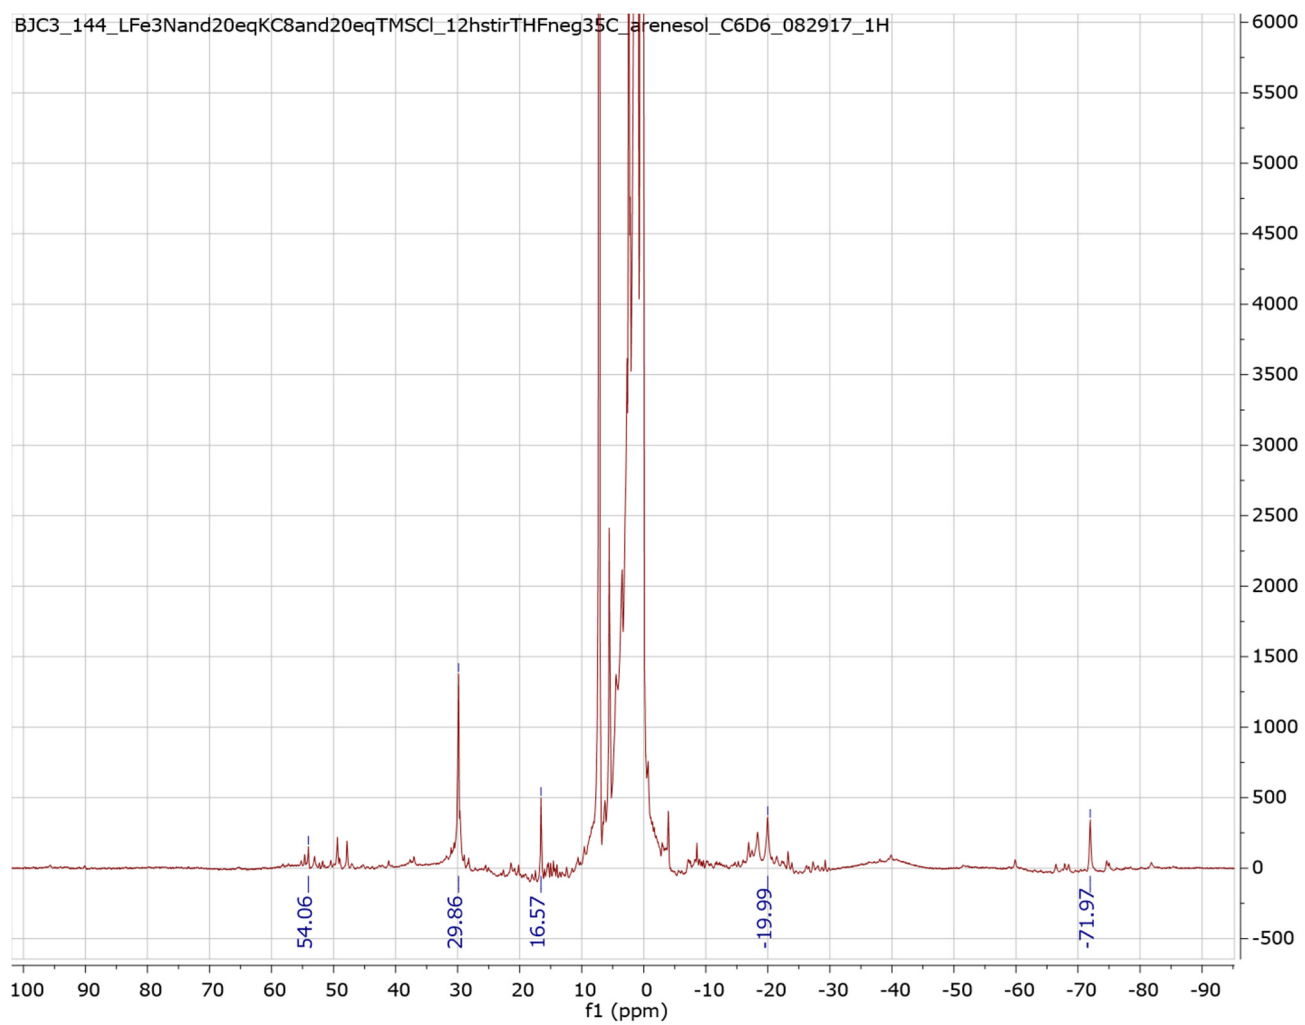

**Figure S27.** <sup>1</sup>H NMR of the reaction between Fe<sub>3</sub>(μ<sub>3</sub>-N)L, 20 equiv. KC<sub>8</sub> and 20 equiv. Me<sub>3</sub>SiCl in THF at -35 °C recorded in C<sub>6</sub>D<sub>6</sub>.

## Crystallographic data

**Table S4.** Crystal data for Fe<sub>3</sub>Cl<sub>3</sub>L.

|                                   |                                                                                |                  |
|-----------------------------------|--------------------------------------------------------------------------------|------------------|
| Identification code               | bk102a_0m                                                                      |                  |
| Empirical formula                 | C <sub>57</sub> H <sub>75</sub> Cl <sub>3</sub> Fe <sub>3</sub> N <sub>6</sub> |                  |
| Formula weight                    | 1118.13                                                                        |                  |
| Temperature                       | 100(2) K                                                                       |                  |
| Wavelength                        | 0.71073 Å                                                                      |                  |
| Crystal system                    | Triclinic                                                                      |                  |
| Space group                       | P-1                                                                            |                  |
| Unit cell dimensions              | a = 12.6922(5) Å                                                               | a = 76.0639(7)°. |
|                                   | b = 13.0313(5) Å                                                               | b = 84.1498(7)°. |
|                                   | c = 16.6470(6) Å                                                               | g = 84.0536(7)°. |
| Volume                            | 2649.46(17) Å <sup>3</sup>                                                     |                  |
| Z                                 | 2                                                                              |                  |
| Density (calculated)              | 1.402 Mg/m <sup>3</sup>                                                        |                  |
| Absorption coefficient            | 1.006 mm <sup>-1</sup>                                                         |                  |
| F(000)                            | 1176                                                                           |                  |
| Crystal size                      | 0.138 x 0.130 x 0.088 mm <sup>3</sup>                                          |                  |
| Theta range for data collection   | 1.264 to 29.999°.                                                              |                  |
| Index ranges                      | -17<=h<=17, -18<=k<=18, -23<=l<=23                                             |                  |
| Reflections collected             | 65920                                                                          |                  |
| Independent reflections           | 15433 [R(int) = 0.0897]                                                        |                  |
| Completeness to theta = 25.242°   | 100.0 %                                                                        |                  |
| Absorption correction             | None                                                                           |                  |
| Refinement method                 | Full-matrix least-squares on F <sup>2</sup>                                    |                  |
| Data / restraints / parameters    | 15433 / 0 / 634                                                                |                  |
| Goodness-of-fit on F <sup>2</sup> | 1.002                                                                          |                  |
| Final R indices [I>2sigma(I)]     | R1 = 0.0570, wR2 = 0.1025                                                      |                  |
| R indices (all data)              | R1 = 0.1038, wR2 = 0.1130                                                      |                  |
| Extinction coefficient            | n/a                                                                            |                  |
| Largest diff. peak and hole       | 1.491 and -0.876 e.Å <sup>-3</sup>                                             |                  |

## References

- (1) Guillet, G. L.; Sloane, F. T.; Ermert, D. M.; Calkins, M. W.; Peprah, M. K.; Knowles, E. S.; Čížmár, E.; Abboud, K. A.; Meisel, M. W.; Murray, L. J. Preorganized Assembly of Three Iron(II) or Manganese(II)  $\beta$ -Diketiminato Complexes Using a Cyclophane Ligand. *Chem. Commun.* **2013**, *49*, 6635–6637.
- (2) Ermert, D. M.; Gordon, J. B.; Abboud, K. A.; Murray, L. J. Nitride-Bridged Triiron Complex and Its Relevance to Dinitrogen Activation. *Inorg. Chem.* **2015**, *54*, 9282–9289.
- (3) Lee, Y.; Anderton, K. J.; Sloane, F. T.; Ermert, D. M.; Abboud, K. A.; García-Serres, R.; Murray, L. J. Reactivity of Hydride Bridges in High-Spin  $[3M-3(\mu-H)]$  Clusters ( $M = Fe^{II}, Co^{II}$ ). *J. Am. Chem. Soc.* **2015**, *3*, 10610–10617.
- (4) Lee, Y.; Abboud, K. A.; García-Serres, R.; Murray, L. J. A Three-Coordinate Fe(II) Center within a  $[3Fe-(\mu_3-S)]$  Cluster That Provides an Accessible Coordination Site. *Chem. Commun.* **2016**, *52*, 9295–9298.
- (5) Anderton, K. J.; Knight, B. J.; Rheingold, A. L.; Abboud, K. A.; García-Serres, R.; Murray, L. J. Reactivity of Hydride Bridges in a High-Spin  $[Fe_3(\mu-H)_3]^{3+}$  Cluster: Reversible  $H_2/CO$  Exchange and Fe–H/B–F Bond Metathesis. *Chem. Sci.* **2017**, *8*, 4123–4129.
- (6) Eckert, N. A.; Smith, J. M.; Lachicotte, R. J.; Holland, P. L. Low-Coordinate Iron(II) Amido Complexes of  $\beta$ -Diketiminates: Synthesis, Structure, and Reactivity. *Inorg. Chem.* **2004**, *43*, 3306–3321.
- (7) Yuki, M.; Tanaka, H.; Sasaki, K.; Miyake, Y.; Yoshizawa, K.; Nishibayashi, Y. Iron-Catalysed Transformation of Molecular Dinitrogen into Silylamine under Ambient Conditions. *Nat. Commun.* **2012**, *3*, 1254.
- (8) Ung, G.; Peters, J. C. Low-Temperature  $N_2$  Binding to Two-Coordinate  $L_2Fe^0$  Enables Reductive Trapping of  $L_2FeN_2^-$  and  $NH_3$  Generation. *Angew. Chem. Int. Ed.* **2015**, *54*, 532–535.
- (9) Kuriyama, S.; Arashiba, K.; Nakajima, K.; Matsuo, Y.; Tanaka, H.; Ishii, K.; Yoshizawa, K.; Nishibayashi, Y. Catalytic Transformation of Dinitrogen into Ammonia and Hydrazine by Iron-Dinitrogen Complexes Bearing Pincer Ligand. *Nat. Commun.* **2016**, *7*, 12181.
- (10) Araake, R.; Sakadani, K.; Tada, M.; Sakai, Y.; Ohki, Y.  $[Fe_4]$  and  $[Fe_6]$  Hydride Clusters Supported by Phosphines: Synthesis, Characterization, and Application in  $N_2$  Reduction. *J. Am. Chem. Soc.* **2017**, *139*, 5596–5606.
- (11) Prokopchuk, D. E.; Wiedner, E. S.; Walter, E. D.; Popescu, C. V.; Piro, N. A.; Kassel, W. S.; Bullock, R. M.; Mock, M. T. Catalytic  $N_2$  Reduction to Silylamines and Thermodynamics of  $N_2$  Binding at Square Planar Fe. *J. Am. Chem. Soc.* **2017**, *139*, 9291–9301.
- (12) Imayoshi, R.; Nakajima, K.; Takaya, J.; Iwasawa, N.; Nishibayashi, Y. Synthesis and Reactivity of Iron- and Cobalt-Dinitrogen Complexes Bearing PSiP-Type Pincer Ligands toward Nitrogen Fixation. *Eur. J. Inorg. Chem.* **2017**, *2017*, 3769–3778.
- (13) Tanaka, H.; Sasada, A.; Kouno, T.; Yuki, M.; Miyake, Y.; Nakanishi, H.; Nishibayashi, Y.; Yoshizawa, K. Molybdenum-Catalyzed Transformation of Molecular Dinitrogen into Silylamine: Experimental and DFT Study on the Remarkable Role of Ferrocenyldiphosphine Ligands. *J. Am. Chem. Soc.* **2011**, *133*, 3498–3506.
- (14) Siedschlag, R. B.; Bernales, V.; Vogiatzis, K. D.; Planas, N.; Clouston, L. J.; Bill, E.; Gagliardi, L.; Lu, C. C. Catalytic Silylation of Dinitrogen with a Dicobalt Complex. *J. Am. Chem. Soc.* **2015**, *137*, 4638–4641.
- (15) Suzuki, T.; Fujimoto, K.; Takemoto, Y.; Wasada-Tsutsui, Y.; Ozawa, T.; Inomata, T.; Fryzuk, M. D.;



Masuda, H. Efficient Catalytic Conversion of Dinitrogen to  $\text{N}(\text{SiMe}_3)_3$  Using a Homogeneous Mononuclear Cobalt Complex. *ACS Catal.* **2018**, *8*, 3011–3015.

- (16) Imayoshi, R.; Nakajima, K.; Nishibayashi, Y. Vanadium-Catalyzed Reduction of Molecular Dinitrogen into Silylamine under Ambient Reaction Conditions. *Chem. Lett.* **2017**, *46*, 466–468.
- (17) Kendall, A. J.; Johnson, S. I.; Bullock, R. M.; Mock, M. T. Catalytic Silylation of  $\text{N}_2$  and Synthesis of  $\text{NH}_3$  and  $\text{N}_2\text{H}_4$  by Net Hydrogen Atom Transfer Reactions Using a Chromium P 4 Macrocyclic. *J. Am. Chem. Soc.* **2018**, *140*, 2528–2536.
